# Supplementary material
Source: publisher figshare collection journal article supplement (https://gsapubs.figshare.com/ndownloader/files/36380172)
Supplement: Supplementary file 1 [file 36380172]

## Sheet: Fig. 2
Fig. 2A									Fig. 2B												Fig. 2C												Fig. 2D
Section GL (Sun et al., 2021)									Section JY (Sun et al., 2012; this study)												Section GB (Kang et al., 2020; this study)												Section WN2 (Kang et al., 2018; this study)
Depth	Speleothem correlated age		Depth	Age		Depth	Mean grain size		Depth	OSL age	OSL age error		Depth	Weighted mean age from Bayesian age-depth model	Min age	Max age		Depth	Mean grain size		Depth	OSL age	OSL age error		Depth	Weighted mean age from Bayesian age-depth model	Min age	Max age		Depth	Mean grain size		Depth	OSL age	OSL age error		Depth	Weighted mean age from Bayesian age-depth model	Min age	Max age		Depth	Mean grain size
(m)	(ka)		(m)	(ka)		(m)	(μm)		(m)	(ka)	(ka)		(m)	(ka)	(ka)	(ka)		(m)	(μm)		(m)	(ka)	(ka)		(m)	(ka)	(ka)	(ka)		(m)	(μm)		(m)	(ka)	(ka)		(m)	(ka)	(ka)	(ka)		(m)	(μm)
0.2	4		0	2.2		0	19.795		0.1	1.8	0.2		0.1	1.8689	1.5718	2.2923		0.1	25.941		1	3.86	0.21		1	4.0977	3.768	4.6851		1	32.768		0.1	0.21	0.01		0.1	0.2159	0.1965	0.2366		0.1	18.012
1.2	11.5		0.02	2.37633		0.02	19.364		0.3	4.1	0.2		0.12	2.0914	1.8229	2.4719		0.12	25.117		1.1	4.7	0.25		1.02	4.2121	3.9226	4.7252		1.02	32.753		0.2	0.36	0.02		0.12	0.2448	0.214	0.2763		0.12	18.001
8.3	30		0.04	2.5561		0.04	19.012		0.6	8.5	0.4		0.14	2.3144	2.0696	2.6513		0.14	26.282		1.2	5.27	0.29		1.04	4.3263	4.0691	4.7736		1.04	32.801		0.3	0.5	0.03		0.14	0.2734	0.2224	0.3304		0.14	17.068
11.8	39		0.06	2.73626		0.06	18.603		0.9	10.7	0.4		0.16	2.5369	2.311	2.8375		0.16	25.605		1.3	5.6	0.31		1.06	4.4409	4.207	4.8268		1.06	32.263		0.4	0.48	0.03		0.16	0.3024	0.2506	0.363		0.16	18.147
16.3	48		0.08	2.91835		0.08	19.24		1.2	13.1	0.8		0.18	2.7602	2.5468	3.0298		0.18	25.731		1.4	6.1	0.33		1.08	4.5556	4.3372	4.8789		1.08	32.549		0.5	0.56	0.04		0.18	0.3319	0.295	0.3734		0.18	17.134
19.7	60		0.1	3.09863		0.1	18.41		1.5	14.1	0.4		0.2	2.9829	2.7688	3.2323		0.2	25.629		1.5	6.94	0.38		1.1	4.6714	4.4568	4.9384		1.1	32.46		0.6	0.65	0.04		0.2	0.3615	0.3248	0.3953		0.2	17.114
29.8	77		0.12	3.27796		0.12	19.169		2.1	15.7	0.7		0.22	3.2037	2.9839	3.4425		0.22	22.642		1.6	6.97	0.38		1.12	4.7872	4.5684	5.0189		1.12	33.491		0.7	0.89	0.06		0.22	0.3846	0.3484	0.4162		0.22	17.445
35.2	98		0.14	3.45484		0.14	19.539		3.6	18	0.8		0.24	3.4245	3.1873	3.6644		0.24	22.053		1.7	7.02	0.38		1.14	4.9028	4.6683	5.1274		1.14	32.285		0.8	1.03	0.07		0.24	0.4077	0.3605	0.4568		0.24	16.724
36.9	108		0.16	3.63283		0.16	19.204		6.9	21.5	1.2		0.26	3.6456	3.389	3.8991		0.26	22.232		1.8	8.41	0.46		1.16	5.0187	4.7578	5.2605		1.16	31.427		0.9	1.14	0.07		0.26	0.4296	0.3807	0.4834		0.26	17.389
40.1	129		0.18	3.81387		0.18	18.806		9	23.4	1.5		0.28	3.8663	3.5849	4.1415		0.28	22.274		1.9	9.43	0.52		1.18	5.1331	4.8366	5.405		1.18	31.701		1	1.33	0.08		0.28	0.4503	0.403	0.4936		0.28	16.644
48.1	165		0.2	4		0.2	18.568		10	25.2	1.7		0.3	4.0871	3.7737	4.3921		0.3	21.634		2	10.34	0.57		1.2	5.2471	4.9053	5.5587		1.2	31.081						0.3	0.471	0.4156	0.5126		0.3	16.918
52.4	178		0.22	4.18121		0.22	17.659		11	26.2	1.2		0.32	4.4209	4.1037	4.7224		0.32	21.855		2.2	11.02	0.59		1.22	5.336	5.0364	5.6148		1.22	32.34						0.32	0.4797	0.4303	0.5185		0.32	17.512
55.7	192		0.24	4.36809		0.24	17.165		12	29.4	1.2		0.34	4.7556	4.3634	5.0965		0.34	21.504		2.4	12.6	0.7		1.24	5.4244	5.1602	5.6729		1.24	31.871						0.34	0.4884	0.4402	0.5278		0.34	16.768
57.5	199		0.26	4.55727		0.26	16.949		13	29.7	1.4		0.36	5.0925	4.5951	5.5037		0.36	21.968		2.6	12.05	0.66		1.26	5.5129	5.2781	5.7388		1.26	32.85						0.36	0.4963	0.4511	0.5363		0.36	16.504
58.6	209		0.28	4.74546		0.28	17.029		14	31.7	1.2		0.38	5.4295	4.8089	5.9332		0.38	22.018		3	13.65	0.73		1.28	5.6012	5.3846	5.8164		1.28	32.296						0.38	0.5038	0.4626	0.5431		0.38	17.409
60.5	226		0.3	4.92847		0.3	17.435						0.4	5.7646	5.0094	6.3658		0.4	22.901		3.4	14.4	0.8		1.3	5.6903	5.4753	5.9087		1.3	32.255						0.4	0.5111	0.4708	0.5523		0.4	17.194
63.3	234		0.32	5.1102		0.32	18.405						0.42	6.0981	5.2053	6.8075		0.42	22.667		3.8	15.18	0.84		1.32	5.7793	5.5522	6.0147		1.32	33.19						0.42	0.5216	0.4856	0.5603		0.42	16.737
65.2	242		0.34	5.28483		0.34	17.399						0.44	6.4315	5.4026	7.2513		0.44	23.349		4.2	17.94	0.98		1.34	5.8684	5.618	6.1302		1.34	31.88						0.44	0.5321	0.4941	0.5728		0.44	16.265
71.6	265		0.36	5.45806		0.36	19.6						0.46	6.7653	5.591	7.6987		0.46	23.246		4.6	17.39	0.95		1.36	5.9571	5.6779	6.2463		1.36	31.913						0.46	0.5439	0.5061	0.5855		0.46	16.542
82.2	281		0.38	5.62517		0.38	18.853						0.48	7.0992	5.7776	8.1499		0.48	22.78		5	16.42	0.89		1.38	6.0462	5.7284	6.3695		1.38	32.022						0.48	0.5569	0.519	0.5963		0.48	16.741
86.9	302		0.4	5.79009		0.4	19.445						0.5	7.4323	5.9668	8.6014		0.5	22.946		5.2	17.12	0.93		1.4	6.1351	5.774	6.4977		1.4	31.426						0.5	0.5697	0.5267	0.6147		0.5	17.228
90.4	335		0.42	5.94808		0.42	20.368						0.52	7.639	6.3872	8.6539		0.52	23.442		5.4	18.71	1.03		1.42	6.22	5.8925	6.5456		1.42	32.128						0.52	0.586	0.5474	0.626		0.52	16.184
97.4	351		0.44	6.10038		0.44	21.428						0.54	7.8466	6.7918	8.7258		0.54	23.754		6	18.59	1.04		1.44	6.3047	6.0004	6.6002		1.44	31.317						0.54	0.6022	0.5587	0.6479		0.54	15.418
104.2	378		0.46	6.24846		0.46	21.732						0.56	8.0543	7.1862	8.7989		0.56	23.616		6.6	18.46	1.19		1.46	6.39	6.0963	6.668		1.46	31.494						0.56	0.6194	0.5741	0.6701		0.56	16.289
107.1	395		0.48	6.39529		0.48	22.176						0.58	8.2622	7.5493	8.8961		0.58	23.489		7.2	18.92	1.04		1.48	6.4757	6.1878	6.7465		1.48	31.311						0.58	0.6375	0.5894	0.6918		0.58	14.747
110.6	426		0.5	6.54418		0.5	21.99						0.6	8.4705	7.8478	9.028		0.6	23.385		7.8	20.51	1.16		1.5	6.5606	6.26	6.842		1.5	31.76						0.6	0.6553	0.5997	0.7225		0.6	14.291
120.4	450		0.52	6.69426		0.52	20.814						0.62	8.6778	8.0654	9.212		0.62	23.46		8.4	19.51	1.07		1.52	6.6445	6.3209	6.9485		1.52	31.453						0.62	0.6821	0.6346	0.7421		0.62	14.514
125.6	466		0.54	6.84474		0.54	21.663						0.64	8.8865	8.2051	9.4931		0.64	24.806		8.6	20.31	1.11		1.54	6.7283	6.3736	7.0658		1.54	31.058						0.64	0.7088	0.6517	0.779		0.64	14.241
130.2	478		0.56	6.99145		0.56	21.819						0.66	9.0926	8.3026	9.8315		0.66	24.721		9	20.8	1.14		1.56	6.8125	6.4292	7.1945		1.56	32.012						0.66	0.7456	0.6833	0.819		0.66	14.875
132.9	510		0.58	7.14325		0.58	22.468						0.68	9.2989	8.3727	10.2167		0.68	24.675		9.8	22.7	1.27		1.58	6.8966	6.476	7.3253		1.58	31.706						0.68	0.7929	0.7151	0.8656		0.68	14.174
137.9	531		0.6	7.30094		0.6	19.45						0.7	9.5049	8.4281	10.619		0.7	24.668		10.6	21.35	1.22		1.6	6.9806	6.5123	7.4587		1.6	31.528						0.7	0.8392	0.7355	0.9364		0.7	15.053
140.7	549		0.62	7.46034		0.62	19.438						0.72	9.6267	8.6511	10.6541		0.72	24.811		11.4	22.09	1.22		1.62	7.0947	6.6704	7.5336		1.62	31.78						0.72	0.8826	0.809	0.9543		0.72	15.351
143.1	568		0.64	7.61573		0.64	21.81						0.74	9.7488	8.8701	10.6866		0.74	25.125		12.2	22.62	1.28		1.64	7.2091	6.82	7.6147		1.64	32.385						0.74	0.9265	0.8494	0.9933		0.74	14.799
144.3	582		0.66	7.76844		0.66	21.019						0.76	9.8702	9.0803	10.7227		0.76	25.091		13	23.49	1.29		1.66	7.3239	6.9599	7.7088		1.66	32.573						0.76	0.962	0.881	1.0384		0.76	15.442
151.4	626		0.68	7.92332		0.68	20.526						0.78	9.9923	9.2836	10.7658		0.78	25.482		14	23.79	1.32		1.68	7.4389	7.0703	7.8156		1.68	33.216						0.78	0.9899	0.91	1.0616		0.78	15.529
			0.7	8.07642		0.7	20.924						0.8	10.1145	9.4722	10.8141		0.8	25.691		15	24.85	1.36		1.7	7.5545	7.1653	7.9383		1.7	33.109						0.8	1.0178	0.9265	1.1038		0.8	15.45
			0.72	8.22817		0.72	21.748						0.82	10.2378	9.6517	10.8698		0.82	27.296		16	24.5	1.36		1.72	7.6681	7.24	8.074		1.72	32.068						0.82	1.0452	0.9717	1.1171		0.82	15.459
			0.74	8.37539		0.74	21.083						0.84	10.3612	9.8067	10.9417		0.84	26.793		17	25.79	1.46		1.74	7.7828	7.2973	8.2206		1.74	32.506						0.84	1.0729	0.9973	1.1412		0.84	14.896
			0.76	8.51973		0.76	22.892						0.86	10.4852	9.9446	11.0363		0.86	26.897		18	25.97	1.44		1.76	7.8971	7.3538	8.373		1.76	32.748						0.86	1.0987	1.0229	1.1688		0.86	16.141
			0.78	8.65912		0.78	23.057						0.88	10.6089	10.0594	11.1632		0.88	27.434		19	28.05	1.53		1.78	8.0114	7.401	8.5319		1.78	32.643						0.88	1.1229	1.0476	1.1935		0.88	15.207
			0.8	8.79816		0.8	23.463						0.9	10.7322	10.162	11.3093		0.9	26.934						1.8	8.1259	7.4451	8.706		1.8	32.789						0.9	1.1469	1.0633	1.2323		0.9	15.407
			0.82	8.93356		0.82	23.063						0.92	10.8949	10.3691	11.4304		0.92	26.831						1.82	8.348	7.7448	8.856		1.82	34.219						0.92	1.1712	1.1014	1.2481		0.92	15.134
			0.84	9.06232		0.84	24.934						0.94	11.0569	10.5326	11.5672		0.94	27.221						1.84	8.57	8.038	9.0158		1.84	33.2						0.94	1.1957	1.1245	1.2728		0.94	15.968
			0.86	9.18404		0.86	27.145						0.96	11.2189	10.6614	11.7339		0.96	27.027						1.86	8.7924	8.3281	9.1925		1.86	33.802						0.96	1.2217	1.1469	1.301		0.96	15.265
			0.88	9.30794		0.88	27.405						0.98	11.3813	10.753	11.9237		0.98	27.072						1.88	9.0148	8.6001	9.3852		1.88	32.88						0.98	1.2501	1.1669	1.3341		0.98	15.742
			0.9	9.43589		0.9	23.542						1	11.5429	10.8345	12.1386		1	27.251						1.9	9.2376	8.8417	9.5986		1.9	34.35						1	1.2781	1.1798	1.3831		1	16.106
			0.92	9.57129		0.92	24.67						1.02	11.7039	10.8993	12.3808		1.02	27.215						1.92	9.4601	9.051	9.8318		1.92	33.652
			0.94	9.70858		0.94	23.247						1.04	11.8639	10.9544	12.632		1.04	26.944						1.94	9.6825	9.2386	10.0864		1.94	34.059
			0.96	9.84802		0.96	22.553						1.06	12.0234	10.9981	12.8963		1.06	27.026						1.96	9.9048	9.4061	10.3487		1.96	33.573
			0.98	9.98643		0.98	23.589						1.08	12.1834	11.0429	13.1601		1.08	27.346						1.98	10.1275	9.5554	10.63		1.98	33.581
			1	10.1226		1	23.759						1.1	12.3436	11.092	13.4309		1.1	28.507						2	10.3495	9.7029	10.919		2	35.252
			1.02	10.2539		1.02	23.71						1.12	12.4488	11.3106	13.4603		1.12	29.435						2.02	10.4223	9.8266	10.9594		2.02	34.822
			1.04	10.3768		1.04	26.199						1.14	12.5555	11.5074	13.4967		1.14	29.889						2.04	10.4949	9.945	11.002		2.04	34.01
			1.06	10.4929		1.06	28.862						1.16	12.663	11.6978	13.5364		1.16	30.65						2.06	10.5678	10.0484	11.0517		2.06	34.247
			1.08	10.6076		1.08	28.218						1.18	12.7705	11.8639	13.5828		1.18	30.579						2.08	10.6403	10.1466	11.1105		2.08	34.135
			1.1	10.7218		1.1	27.285						1.2	12.8773	12.0118	13.6301		1.2	30.809						2.1	10.7138	10.2233	11.1857		2.1	34.432
			1.12	10.8325		1.12	29.26						1.22	12.9847	12.1258	13.6895		1.22	31.851						2.12	10.7874	10.2899	11.2792		2.12	36.388
			1.14	10.9385		1.14	30.861						1.24	13.0911	12.2122	13.7673		1.24	31.45						2.14	10.8608	10.3487	11.3804		2.14	34.823
			1.16	11.0431		1.16	31.084						1.26	13.1979	12.2903	13.8687		1.26	32.003						2.16	10.9341	10.3936	11.4924		2.16	35.806
			1.18	11.153		1.18	30.621						1.28	13.3045	12.355	14.0067		1.28	31.869						2.18	11.0072	10.4379	11.6116		2.18	34.431
			1.2	11.2678		1.2	26.313						1.3	13.4108	12.4135	14.1817		1.3	32.073						2.2	11.0801	10.472	11.7438		2.2	34.803
			1.22	11.3856		1.22	27.31						1.32	13.4756	12.5619	14.1987		1.32	32.05						2.22	11.1714	10.6065	11.7848		2.22	34.513
			1.24	11.5		1.24	28.52						1.34	13.5403	12.7177	14.2182		1.34	33.062						2.24	11.2624	10.7287	11.8304		2.24	35.016
			1.26	11.5618		1.26	28.762						1.36	13.6052	12.8592	14.2392		1.36	32.876						2.26	11.3537	10.8355	11.8883		2.26	34.996
			1.28	11.6228		1.28	29.429						1.38	13.6705	12.9947	14.2653		1.38	32.998						2.28	11.4449	10.9202	11.9567		2.28	36.289
			1.3	11.6837		1.3	29.74						1.4	13.7362	13.1073	14.2923		1.4	33.564						2.3	11.5364	10.9918	12.0383		2.3	35.663
			1.32	11.7434		1.32	28.984						1.42	13.8021	13.2115	14.3242		1.42	33.117						2.32	11.6283	11.0569	12.1395		2.32	36.32
			1.34	11.8031		1.34	30.994						1.44	13.8682	13.3068	14.3646		1.44	33.101						2.34	11.7204	11.1062	12.2528		2.34	36.014
			1.36	11.8618		1.36	29.914						1.46	13.9342	13.3848	14.4122		1.46	33.252						2.36	11.8115	11.15	12.3852		2.36	35.814
			1.38	11.92		1.38	30.397						1.48	14.0002	13.4439	14.4764		1.48	33.704						2.38	11.9022	11.1912	12.5262		2.38	35.8
			1.4	11.9779		1.4	31.812						1.5	14.0664	13.4917	14.554		1.5	34.231						2.4	11.9922	11.2296	12.6747		2.4	35.573
			1.42	12.0355		1.42	30.444						1.52	14.1125	13.5487	14.5902		1.52	32.335						2.42	12.0307	11.3019	12.6913		2.42	36.952
			1.44	12.0934		1.44	30.853						1.54	14.1587	13.6019	14.6319		1.54	32.442						2.44	12.0701	11.3704	12.7179		2.44	37.332
			1.46	12.1498		1.46	31.376						1.56	14.2047	13.6451	14.6813		1.56	33.65						2.46	12.1098	11.4345	12.7466		2.46	35.463
			1.48	12.2065		1.48	32.863						1.58	14.2507	13.68	14.7364		1.58	34.427						2.48	12.1495	11.4894	12.7761		2.48	35.361
			1.5	12.2638		1.5	30.222						1.6	14.2974	13.7127	14.8093		1.6	34.673						2.5	12.1895	11.5441	12.8117		2.5	36.116
			1.52	12.3227		1.52	30.508						1.62	14.344	13.7464	14.8905		1.62	35.188						2.52	12.2296	11.5903	12.8494		2.52	36.55
			1.54	12.3803		1.54	30.33						1.64	14.3905	13.769	14.98		1.64	35.716						2.54	12.2695	11.6316	12.8953		2.54	35.724
			1.56	12.4365		1.56	32.371						1.66	14.436	13.789	15.0735		1.66	36.248						2.56	12.3087	11.6695	12.9464		2.56	35.789
			1.58	12.4927		1.58	32.656						1.68	14.4813	13.8083	15.1814		1.68	36.322						2.58	12.3472	11.7008	13.0044		2.58	35.783
			1.6	12.549		1.6	30.406						1.7	14.5267	13.8271	15.2935		1.7	36.73						2.6	12.3856	11.7284	13.066		2.6	35.779
			1.62	12.6057		1.62	32.138						1.72	14.5723	13.8873	15.3207		1.72	36.552						2.62	12.4422	11.808	13.1007		2.62	36.816
			1.64	12.661		1.64	32.044						1.74	14.6168	13.9458	15.3419		1.74	36.722						2.64	12.4985	11.8764	13.1381		2.64	36.388
			1.66	12.7153		1.66	32.855						1.76	14.6626	13.9908	15.375		1.76	36.26						2.66	12.5554	11.9365	13.1823		2.66	36.169
			1.68	12.768		1.68	33.833						1.78	14.7076	14.0358	15.412		1.78	35.915						2.68	12.6127	11.9838	13.2293		2.68	36.117
			1.7	12.8201		1.7	34.963						1.8	14.7526	14.0736	15.4515		1.8	36.927						2.7	12.6693	12.0234	13.2863		2.7	36.88
			1.72	12.8713		1.72	34.177						1.82	14.7977	14.1052	15.4977		1.82	36.837						2.72	12.7267	12.0617	13.3534		2.72	35.914
			1.74	12.9225		1.74	35.606						1.84	14.8429	14.1382	15.55		1.84	36.98						2.74	12.7839	12.0939	13.4271		2.74	36.374
			1.76	12.9734		1.76	35.078						1.86	14.8884	14.165	15.6116		1.86	36.671						2.76	12.8407	12.121	13.5192		2.76	36.014
			1.78	13.0253		1.78	34.526						1.88	14.9325	14.1863	15.6826		1.88	37.304						2.78	12.8977	12.1494	13.6228		2.78	36.399
			1.8	13.0789		1.8	33.798						1.9	14.9765	14.2069	15.7579		1.9	37.337						2.8	12.9527	12.1669	13.7301		2.8	37.014
			1.82	13.135		1.82	31.637						1.92	15.0191	14.2772	15.7804		1.92	37.599						2.82	13.0089	12.2645	13.7558		2.82	35.847
			1.84	13.1933		1.84	30.206						1.94	15.0628	14.3362	15.7969		1.94	37.818						2.84	13.0649	12.3581	13.7828		2.84	36.448
			1.86	13.2509		1.86	30.208						1.96	15.1065	14.3956	15.8273		1.96	37.552						2.86	13.1212	12.4434	13.8074		2.86	36.746
			1.88	13.3066		1.88	32.572						1.98	15.1508	14.448	15.8511		1.98	36.284						2.88	13.1772	12.5233	13.8416		2.88	36.036
			1.9	13.3612		1.9	33.612						2	15.1949	14.4885	15.8824		2	36.171						2.9	13.2336	12.5919	13.8788		2.9	36.989
			1.92	13.414		1.92	31.935						2.02	15.2396	14.5344	15.9124		2.02	37.886						2.92	13.2907	12.645	13.921		2.92	36.12
			1.94	13.4659		1.94	36.002						2.04	15.2841	14.574	15.9493		2.04	38.586						2.94	13.3457	12.6884	13.9632		2.94	36.799
			1.96	13.5164		1.96	35.374						2.06	15.3282	14.6062	15.992		2.06	38.177						2.96	13.4005	12.7248	14.0202		2.96	36.156
			1.98	13.5678		1.98	34.87						2.08	15.3729	14.6355	16.045		2.08	38.231						2.98	13.455	12.7571	14.0901		2.98	35.572
			2	13.6188		2	34.147						2.1	15.4175	14.6621	16.1072		2.1	37.834						3	13.5104	12.7852	14.1718		3	36.548
			2.02	13.6695		2.02	36.049						2.12	15.4486	14.6908	16.1344		2.12	36.719						3.02	13.5562	12.8513	14.2026		3.02	36.381
			2.04	13.7185		2.04	35.526						2.14	15.4796	14.7238	16.1632		2.14	35.925						3.04	13.6033	12.9166	14.2382		3.04	36.418
			2.06	13.7664		2.06	38.02						2.16	15.5109	14.7513	16.1961		2.16	36.55						3.06	13.6497	12.973	14.2733		3.06	36.327
			2.08	13.8139		2.08	38.243						2.18	15.542	14.7749	16.2297		2.18	37.364						3.08	13.6963	13.0263	14.3138		3.08	36.861
			2.1	13.862		2.1	36.611						2.2	15.5733	14.7975	16.2692		2.2	37.418						3.1	13.743	13.0701	14.3644		3.1	37.023
			2.12	13.9126		2.12	36.643						2.22	15.6045	14.8185	16.3142		2.22	37.925						3.12	13.79	13.102	14.4158		3.12	38.11
			2.14	13.9653		2.14	32.839						2.24	15.635	14.8391	16.3617		2.24	38.546						3.14	13.8367	13.1308	14.4813		3.14	36.648
			2.16	14.0215		2.16	32.184						2.26	15.6655	14.8601	16.415		2.26	38.724						3.16	13.883	13.1641	14.551		3.16	37.217
			2.18	14.0789		2.18	30.374						2.28	15.6955	14.8805	16.4703		2.28	38.193						3.18	13.9297	13.1905	14.627		3.18	37.276
			2.2	14.1367		2.2	30.978						2.3	15.7261	14.8933	16.5322		2.3	38.919						3.2	13.9753	13.2104	14.7099		3.2	37.713
			2.22	14.1921		2.22	31.439						2.32	15.7571	14.9319	16.5566		2.32	39.295						3.22	14.019	13.2904	14.7341		3.22	37.413
			2.24	14.2462		2.24	34.29						2.34	15.7882	14.9607	16.5871		2.34	38.162						3.24	14.063	13.3619	14.7607		3.24	37.747
			2.26	14.2996		2.26	33.44						2.36	15.8186	14.9925	16.6105		2.36	38.726						3.26	14.1073	13.4371	14.7858		3.26	37.508
			2.28	14.3537		2.28	32.764						2.38	15.8496	15.0179	16.6396		2.38	38.482						3.28	14.1517	13.5025	14.8167		3.28	38.316
			2.3	14.4048		2.3	32.802						2.4	15.8802	15.0383	16.6668		2.4	36.981						3.3	14.1957	13.5501	14.844		3.3	37.374
			2.32	14.4532		2.32	39.331						2.42	15.9112	15.0622	16.7041		2.42	37.692						3.32	14.2401	13.6031	14.8839		3.32	37.744
			2.34	14.499		2.34	38.752						2.44	15.9419	15.087	16.7446		2.44	37.544						3.34	14.2845	13.6396	14.9305		3.34	38.645
			2.36	14.5453		2.36	38.906						2.46	15.9726	15.1094	16.7863		2.46	38.316						3.36	14.3287	13.6769	14.9773		3.36	39.308
			2.38	14.5912		2.38	38.259						2.48	16.0036	15.1343	16.8339		2.48	38.307						3.38	14.3732	13.7128	15.0302		3.38	39.231
			2.4	14.6373		2.4	39.714						2.5	16.0342	15.1507	16.8831		2.5	38.155						3.4	14.4167	13.7383	15.0922		3.4	38.912
			2.42	14.6835		2.42	38.318						2.52	16.0645	15.1881	16.908		2.52	37.729						3.42	14.4593	13.7979	15.1184		3.42	39.499
			2.44	14.7302		2.44	38.163						2.54	16.0947	15.2218	16.9309		2.54	37.559						3.44	14.5022	13.8552	15.149		3.44	39.747
			2.46	14.7765		2.46	38.176						2.56	16.1252	15.2575	16.957		2.56	37.661						3.46	14.5444	13.8997	15.1798		3.46	39.279
			2.48	14.8232		2.48	39.509						2.58	16.1552	15.284	16.9863		2.58	37.515						3.48	14.5863	13.939	15.2146		3.48	38.653
			2.5	14.8701		2.5	37.266						2.6	16.1861	15.3165	17.0219		2.6	38.394						3.5	14.6292	13.9741	15.2553		3.5	39.268
			2.52	14.917		2.52	37.434						2.62	16.2161	15.3454	17.0623		2.62	37.938						3.52	14.6713	14.0109	15.3002		3.52	38.795
			2.54	14.9615		2.54	39.672						2.64	16.2463	15.3686	17.1013		2.64	37.5						3.54	14.7137	14.0393	15.3571		3.54	39.295
			2.56	15.0038		2.56	43.304						2.66	16.2773	15.3948	17.145		2.66	37.961						3.56	14.7564	14.0675	15.4192		3.56	39.284
			2.58	15.0453		2.58	44.015						2.68	16.3078	15.4113	17.1913		2.68	38.553						3.58	14.7982	14.0944	15.484		3.58	39.123
			2.6	15.0881		2.6	41.824						2.7	16.339	15.4294	17.2438		2.7	37.762						3.6	14.8401	14.1152	15.5555		3.6	39.307
			2.62	15.1321		2.62	39.566						2.72	16.3686	15.4724	17.2629		2.72	36.208						3.62	14.8806	14.186	15.58		3.62	40.185
			2.64	15.1762		2.64	40.455						2.74	16.3981	15.5099	17.2836		2.74	37.481						3.64	14.921	14.2433	15.6073		3.64	41.203
			2.66	15.2203		2.66	41.349						2.76	16.4286	15.5434	17.3082		2.76	36.828						3.66	14.9622	14.2994	15.6349		3.66	39.324
			2.68	15.2653		2.68	40.057						2.78	16.4587	15.5734	17.3351		2.78	37.267						3.68	15.0044	14.3561	15.6697		3.68	39.57
			2.7	15.313		2.7	37.512						2.8	16.4883	15.6002	17.3625		2.8	38.063						3.7	15.0466	14.4082	15.7067		3.7	40.223
			2.72	15.3626		2.72	34.964						2.82	16.5184	15.6263	17.3918		2.82	37.144						3.72	15.0889	14.4496	15.7473		3.72	40.631
			2.74	15.4125		2.74	35.74						2.84	16.549	15.6511	17.4263		2.84	36.803						3.74	15.1304	14.4834	15.7905		3.74	40.846
			2.76	15.462		2.76	36.663						2.86	16.5795	15.6747	17.4592		2.86	35.262						3.76	15.1717	14.5115	15.8391		3.76	40.574
			2.78	15.513		2.78	35.975						2.88	16.6093	15.6905	17.4958		2.88	35.614						3.78	15.2132	14.5353	15.8964		3.78	41.338
			2.8	15.5656		2.8	32.416						2.9	16.6394	15.713	17.5397		2.9	36.511						3.8	15.2546	14.5579	15.9587		3.8	40.751
			2.82	15.6201		2.82	33.616						2.92	16.669	15.7531	17.5597		2.92	36.686						3.82	15.2983	14.6246	15.9862		3.82	41.396
			2.84	15.6716		2.84	32.436						2.94	16.6993	15.7841	17.5797		2.94	36.489						3.84	15.3422	14.6834	16.0147		3.84	41.695
			2.86	15.7195		2.86	37.996						2.96	16.7291	15.8139	17.605		2.96	37.379						3.86	15.3862	14.729	16.05		3.86	42.636
			2.88	15.7635		2.88	41.569						2.98	16.7589	15.8348	17.6333		2.98	37.395						3.88	15.4302	14.7738	16.087		3.88	42.72
			2.9	15.8071		2.9	42.162						3	16.7887	15.8582	17.6562		3	37.378						3.9	15.4737	14.8119	16.1318		3.9	42.271
			2.92	15.8518		2.92	39.356						3.02	16.8188	15.8806	17.684		3.02	37.104						3.92	15.518	14.8433	16.1757		3.92	43.357
			2.94	15.8988		2.94	38.346						3.04	16.8482	15.9047	17.7124		3.04	36.64						3.94	15.5615	14.8719	16.2315		3.94	42.871
			2.96	15.9461		2.96	36.53						3.06	16.8782	15.9267	17.7483		3.06	36.547						3.96	15.6049	14.8979	16.3012		3.96	43.441
			2.98	15.9948		2.98	38.34						3.08	16.9082	15.951	17.7883		3.08	36.347						3.98	15.6485	14.9202	16.3732		3.98	43.734
			3	16.0435		3	35.355						3.1	16.9377	15.9706	17.8291		3.1	36.395						4	15.6906	14.9397	16.4492		4	44.685
			3.02	16.0948		3.02	36.305						3.12	16.9684	16.0165	17.8488		3.12	36.884						4.02	15.7335	15.0037	16.4736		4.02	44.955
			3.04	16.1465		3.04	32.892						3.14	16.9979	16.0574	17.8674		3.14	36.818						4.04	15.7765	15.0525	16.4983		4.04	45.338
			3.06	16.2006		3.06	34.507						3.16	17.0275	16.0913	17.8864		3.16	36.25						4.06	15.8195	15.0978	16.5265		4.06	47.016
			3.08	16.2547		3.08	31.78						3.18	17.0572	16.1281	17.9061		3.18	35.567						4.08	15.8626	15.1391	16.5596		4.08	46.203
			3.1	16.3081		3.1	32.925						3.2	17.0864	16.1613	17.9307		3.2	34.962						4.1	15.9063	15.1765	16.5929		4.1	45.938
			3.12	16.3585		3.12	35.753						3.22	17.1161	16.1861	17.9531		3.22	34.818						4.12	15.9492	15.211	16.6269		4.12	46.797
			3.14	16.4068		3.14	37.516						3.24	17.1454	16.2147	17.9824		3.24	35.909						4.14	15.9929	15.2449	16.6736		4.14	45.106
			3.16	16.4546		3.16	37.835						3.26	17.175	16.2306	18.0122		3.26	36.043						4.16	16.036	15.2734	16.7346		4.16	45.057
			3.18	16.5013		3.18	36.918						3.28	17.2043	16.2582	18.0448		3.28	36.47						4.18	16.0797	15.3018	16.7989		4.18	44.667
			3.2	16.5471		3.2	40.149						3.3	17.2346	16.2802	18.0837		3.3	37.861						4.2	16.1224	15.3232	16.8681		4.2	46.105
			3.22	16.5924		3.22	39.834						3.32	17.2639	16.3293	18.1011		3.32	37.461						4.22	16.1506	15.3661	16.8849		4.22	47.134
			3.24	16.6381		3.24	38.454						3.34	17.2948	16.3745	18.1219		3.34	37.514						4.24	16.1785	15.4046	16.8988		4.24	45.847
			3.26	16.6847		3.26	39.108						3.36	17.3251	16.4214	18.1415		3.36	37.262						4.26	16.2067	15.438	16.9179		4.26	45.387
			3.28	16.7311		3.28	37.524						3.38	17.3558	16.4622	18.1626		3.38	37.271						4.28	16.2347	15.4696	16.9347		4.28	47.026
			3.3	16.7782		3.3	38.983						3.4	17.3857	16.5011	18.1871		3.4	36.738						4.3	16.2627	15.4953	16.9558		4.3	46.036
			3.32	16.8251		3.32	37.275						3.42	17.4173	16.5297	18.2104		3.42	36.093						4.32	16.2907	15.5199	16.9822		4.32	46.707
			3.34	16.8727		3.34	38.117						3.44	17.4482	16.5603	18.2381		3.44	36.28						4.34	16.3187	15.5457	17.0126		4.34	47.284
			3.36	16.9204		3.36	37.303						3.46	17.4793	16.5897	18.2699		3.46	37.13						4.36	16.3463	15.5684	17.0383		4.36	46.204
			3.38	16.9688		3.38	36.9						3.48	17.5106	16.618	18.3042		3.48	37.252						4.38	16.3745	15.5886	17.0701		4.38	46.955
			3.4	17.0188		3.4	36.571						3.5	17.5419	16.6391	18.3397		3.5	37.217						4.4	16.4017	15.6119	17.1041		4.4	45.472
			3.42	17.07		3.42	33.875						3.52	17.5698	16.6766	18.3582		3.52	37.747						4.42	16.4287	15.6659	17.1189		4.42	45.482
			3.44	17.1223		3.44	34.164						3.54	17.5978	16.7128	18.3792		3.54	37.513						4.44	16.4558	15.7148	17.1357		4.44	44.943
			3.46	17.1738		3.46	34.486						3.56	17.6261	16.7473	18.4009		3.56	37.339						4.46	16.483	15.7573	17.1502		4.46	46.204
			3.48	17.2241		3.48	35.64						3.58	17.6538	16.7741	18.4258		3.58	37.191						4.48	16.5101	15.7974	17.1692		4.48	46.285
			3.5	17.2737		3.5	36.337						3.6	17.6816	16.8054	18.452		3.6	37.683						4.5	16.5376	15.8317	17.1877		4.5	45.046
			3.52	17.3221		3.52	36.292						3.62	17.7097	16.8275	18.477		3.62	37.74						4.52	16.565	15.861	17.2089		4.52	46.747
			3.54	17.3707		3.54	38.006						3.64	17.7373	16.8502	18.5081		3.64	37.186						4.54	16.5924	15.8887	17.235		4.54	46.226
			3.56	17.4185		3.56	36.027						3.66	17.7654	16.8715	18.5394		3.66	37.275						4.56	16.6205	15.9169	17.2616		4.56	46.492
			3.58	17.467		3.58	38.241						3.68	17.7933	16.8924	18.5816		3.68	36.414						4.58	16.648	15.9415	17.2907		4.58	45.427
			3.6	17.5155		3.6	36.388						3.7	17.8214	16.9118	18.6227		3.7	35.817						4.6	16.6754	15.9587	17.326		4.6	46.678
			3.62	17.5643		3.62	35.881						3.72	17.8457	16.9384	18.6449		3.72	36.604						4.62	16.6954	15.994	17.3369		4.62	46.234
			3.64	17.6135		3.64	37.627						3.74	17.8695	16.9671	18.6688		3.74	36.709						4.64	16.7154	16.0326	17.3487		4.64	46.767
			3.66	17.6626		3.66	35.432						3.76	17.8939	16.9926	18.6914		3.76	35.784						4.66	16.7356	16.0614	17.3617		4.66	46.693
			3.68	17.7115		3.68	36.26						3.78	17.918	17.0097	18.7187		3.78	38.306						4.68	16.7557	16.089	17.3749		4.68	47.125
			3.7	17.7613		3.7	37.869						3.8	17.9427	17.0323	18.7495		3.8	39.467						4.7	16.7755	16.115	17.3916		4.7	46.833
			3.72	17.8118		3.72	33.598						3.82	17.9672	17.0516	18.7802		3.82	37.757						4.72	16.7954	16.1339	17.4096		4.72	48.337
			3.74	17.864		3.74	34.666						3.84	17.9911	17.0712	18.8145		3.84	35.789						4.74	16.8156	16.1574	17.4276		4.74	46.293
			3.76	17.9124		3.76	34.573						3.86	18.0155	17.0902	18.8485		3.86	36.006						4.76	16.8359	16.1753	17.4505		4.76	47.627
			3.78	17.9577		3.78	41.539						3.88	18.0394	17.1047	18.8943		3.88	37.458						4.78	16.8558	16.1925	17.4689		4.78	47.041
			3.8	18.0003		3.8	42.307						3.9	18.0631	17.1231	18.936		3.9	37.254						4.8	16.8762	16.211	17.4934		4.8	46.933
			3.82	18.043		3.82	41.829						3.92	18.0873	17.1498	18.9586		3.92	38.669						4.82	16.8952	16.2396	17.5075		4.82	47.061
			3.84	18.0864		3.84	41.55						3.94	18.111	17.1759	18.9799		3.94	39.051						4.84	16.9143	16.2723	17.5218		4.84	47.007
			3.86	18.131		3.86	40.189						3.96	18.135	17.2009	19.002		3.96	39.286						4.86	16.9339	16.3004	17.5358		4.86	46.555
			3.88	18.1777		3.88	38.556						3.98	18.1589	17.2214	19.0284		3.98	38.454						4.88	16.9533	16.3261	17.5529		4.88	44.564
			3.9	18.2268		3.9	36.11						4	18.1833	17.2454	19.0572		4	37.272						4.9	16.9727	16.3491	17.5715		4.9	46.14
			3.92	18.2783		3.92	34.371						4.02	18.2068	17.2646	19.088		4.02	37.32						4.92	16.9922	16.3738	17.5881		4.92	47.088
			3.94	18.3294		3.94	33.679						4.04	18.2305	17.2842	19.1223		4.04	36.803						4.94	17.0114	16.3919	17.606		4.94	46.659
			3.96	18.3793		3.96	36.988						4.06	18.2545	17.3028	19.1606		4.06	36.689						4.96	17.0304	16.4081	17.6223		4.96	46.55
			3.98	18.4288		3.98	36.736						4.08	18.2785	17.3197	19.1939		4.08	39.816						4.98	17.0499	16.4256	17.6446		4.98	46.376
			4	18.4786		4	34.72						4.1	18.302	17.3346	19.2326		4.1	39.222						5	17.0688	16.4412	17.6674		5	46.446
			4.02	18.5281		4.02	36.126						4.12	18.326	17.356	19.2519		4.12	38.654						5.02	17.0926	16.4822	17.6842		5.02	46.658
			4.04	18.5784		4.04	37.57						4.14	18.3503	17.378	19.2762		4.14	36.233						5.04	17.1161	16.518	17.6975		5.04	47.22
			4.06	18.6295		4.06	32.782						4.16	18.3744	17.4042	19.3049		4.16	37.323						5.06	17.1395	16.55	17.7162		5.06	46.508
			4.08	18.6829		4.08	34.542						4.18	18.398	17.4228	19.3273		4.18	37.844						5.08	17.1627	16.5793	17.7361		5.08	45.963
			4.1	18.7359		4.1	33.173						4.2	18.4223	17.4424	19.3558		4.2	38.101						5.1	17.1862	16.6067	17.7543		5.1	46.371
			4.12	18.7885		4.12	33.529						4.22	18.4462	17.4634	19.383		4.22	38.717						5.12	17.2094	16.6305	17.776		5.12	45.525
			4.14	18.8383		4.14	35.12						4.24	18.4701	17.4818	19.416		4.24	40.69						5.14	17.2328	16.6531	17.8024		5.14	46.893
			4.16	18.8849		4.16	39.167						4.26	18.4941	17.4985	19.4535		4.26	40.659						5.16	17.2566	16.6721	17.8283		5.16	47.88
			4.18	18.93		4.18	40.633						4.28	18.5175	17.5178	19.4845		4.28	39.562						5.18	17.2803	16.6901	17.8598		5.18	47.155
			4.2	18.9749		4.2	39.313						4.3	18.5421	17.5334	19.5202		4.3	38.286						5.2	17.3041	16.7112	17.892		5.2	47.133
			4.22	19.0215		4.22	39.333						4.32	18.5661	17.56	19.5461		4.32	38.099						5.22	17.3303	16.7497	17.9064		5.22	47.375
			4.24	19.0704		4.24	36.562						4.34	18.5894	17.5881	19.5652		4.34	37.792						5.24	17.3565	16.7829	17.9236		5.24	45.567
			4.26	19.123		4.26	33.695						4.36	18.6138	17.6112	19.5861		4.36	39.355						5.26	17.3825	16.8135	17.9405		5.26	47.163
			4.28	19.1781		4.28	31.753						4.38	18.6374	17.6329	19.6124		4.38	39.798						5.28	17.4087	16.8417	17.9608		5.28	48.779
			4.3	19.2323		4.3	31.824						4.4	18.661	17.6566	19.6379		4.4	39.658						5.3	17.435	16.8636	17.9848		5.3	47.837
			4.32	19.283		4.32	35.441						4.42	18.6848	17.6819	19.6652		4.42	39.084						5.32	17.4612	16.8854	18.0137		5.32	46.665
			4.34	19.3308		4.34	38.344						4.44	18.7078	17.696	19.6943		4.44	39.126						5.34	17.4876	16.905	18.0453		5.34	46.96
			4.36	19.3782		4.36	38.437						4.46	18.7314	17.7121	19.7253		4.46	38.632						5.36	17.5136	16.9212	18.079		5.36	47.541
			4.38	19.426		4.38	36.43						4.48	18.7546	17.7294	19.7557		4.48	39.058						5.38	17.5404	16.9378	18.1141		5.38	46.247
			4.4	19.4732		4.4	37.341						4.5	18.7776	17.7471	19.7929		4.5	39.175						5.4	17.5665	16.9512	18.156		5.4	46.657
			4.42	19.5197		4.42	39.799						4.52	18.8013	17.7768	19.809		4.52	37.6						5.42	17.5865	16.9809	18.1702		5.42	46.102
			4.44	19.5649		4.44	38.248						4.54	18.8248	17.8014	19.8295		4.54	37.199						5.44	17.6068	17.0076	18.1826		5.44	46.122
			4.46	19.6093		4.46	40.573						4.56	18.8483	17.8302	19.8508		4.56	38.001						5.46	17.6269	17.0325	18.1996		5.46	45.985
			4.48	19.653		4.48	41.895						4.58	18.8722	17.8554	19.8731		4.58	38.307						5.48	17.647	17.0548	18.2169		5.48	45.528
			4.5	19.6974		4.5	40.279						4.6	18.8958	17.8747	19.9001		4.6	37.894						5.5	17.6674	17.0755	18.2387		5.5	45.87
			4.52	19.7425		4.52	38.678						4.62	18.9197	17.8988	19.922		4.62	37.892						5.52	17.6876	17.0933	18.2581		5.52	47.116
			4.54	19.7883		4.54	39.752						4.64	18.9432	17.9213	19.9479		4.64	40.186						5.54	17.7083	17.1093	18.2835		5.54	46.438
			4.56	19.8351		4.56	38.825						4.66	18.9668	17.9442	19.9779		4.66	41.059						5.56	17.7281	17.1219	18.3106		5.56	46.061
			4.58	19.8839		4.58	36.03						4.68	18.9909	17.97	20.0141		4.68	40.864						5.58	17.7486	17.1401	18.3354		5.58	43.661
			4.6	19.9353		4.6	34.921						4.7	19.0149	17.9872	20.0458		4.7	39.952						5.6	17.7689	17.1528	18.3632		5.6	45.147
			4.62	19.9858		4.62	33.486						4.72	19.0379	18.0186	20.065		4.72	40.747						5.62	17.7882	17.179	18.3755		5.62	45.981
			4.64	20.0351		4.64	37.779						4.74	19.0614	18.0445	20.0853		4.74	40.31						5.64	17.8064	17.2017	18.3894		5.64	45.982
			4.66	20.0829		4.66	37.491						4.76	19.0848	18.0675	20.1092		4.76	40.278						5.66	17.8252	17.2247	18.4086		5.66	45.33
			4.68	20.1308		4.68	36.79						4.78	19.1081	18.0925	20.1305		4.78	37.179						5.68	17.8438	17.2475	18.4238		5.68	43.821
			4.7	20.1786		4.7	37.637						4.8	19.1315	18.1063	20.1522		4.8	37.593						5.7	17.863	17.2656	18.4405		5.7	44.134
			4.72	20.2255		4.72	37.789						4.82	19.1548	18.1296	20.1755		4.82	36.912						5.72	17.8824	17.2845	18.4594		5.72	44.33
			4.74	20.2719		4.74	39.085						4.84	19.1789	18.1462	20.2042		4.84	37.722						5.74	17.9011	17.3008	18.4801		5.74	45.026
			4.76	20.3182		4.76	38.648						4.86	19.2017	18.1621	20.2329		4.86	38.692						5.76	17.9205	17.3162	18.5018		5.76	45.783
			4.78	20.3656		4.78	38.153						4.88	19.224	18.1844	20.2627		4.88	39.105						5.78	17.939	17.3308	18.5256		5.78	42.569
			4.8	20.4139		4.8	36.271						4.9	19.2461	18.192	20.2942		4.9	39.726						5.8	17.9578	17.344	18.5502		5.8	44.122
			4.82	20.4638		4.82	36.484						4.92	19.2706	18.2278	20.3142		4.92	40.406						5.82	17.9773	17.3747	18.5583		5.82	45.531
			4.84	20.5145		4.84	34.847						4.94	19.2944	18.2482	20.3354		4.94	40.105						5.84	17.9974	17.4032	18.5723		5.84	45.442
			4.86	20.5669		4.86	34.364						4.96	19.3184	18.2738	20.3571		4.96	40.17						5.86	18.0172	17.4298	18.5869		5.86	46.219
			4.88	20.62		4.88	33.045						4.98	19.3429	18.295	20.3798		4.98	39.914						5.88	18.0371	17.452	18.6016		5.88	47.848
			4.9	20.6755		4.9	33.594						5	19.3671	18.3206	20.4069		5	38.434						5.9	18.0574	17.4715	18.6199		5.9	47.488
			4.92	20.7317		4.92	30.134						5.02	19.3913	18.3406	20.4315		5.02	38.577						5.92	18.0775	17.493	18.6382		5.92	47.84
			4.94	20.7885		4.94	31.643						5.04	19.4155	18.3581	20.4589		5.04	38.248						5.94	18.0976	17.5112	18.6592		5.94	48.578
			4.96	20.8442		4.96	32.579						5.06	19.4394	18.3743	20.4903		5.06	37.142						5.96	18.1179	17.5291	18.6825		5.96	50.497
			4.98	20.8998		4.98	32.04						5.08	19.4641	18.3925	20.5211		5.08	38.139						5.98	18.1378	17.546	18.7069		5.98	51.113
			5	20.957		5	31.875						5.1	19.488	18.41	20.5519		5.1	38.447						6	18.1579	17.5623	18.7325		6	47.734
			5.02	21.0143		5.02	29.821						5.12	19.5115	18.4415	20.5719		5.12	38.778						6.02	18.1751	17.5868	18.7458		6.02	51.358
			5.04	21.0706		5.04	31.83						5.14	19.5347	18.4704	20.5892		5.14	39.434						6.04	18.1924	17.6107	18.7599		6.04	50.881
			5.06	21.1242		5.06	33.699						5.16	19.5587	18.496	20.6075		5.16	39.84						6.06	18.2102	17.6287	18.7779		6.06	50.462
			5.08	21.1781		5.08	34.577						5.18	19.5823	18.5215	20.6327		5.18	40.035						6.08	18.2271	17.646	18.7933		6.08	48.317
			5.1	21.2332		5.1	31.058						5.2	19.6061	18.5414	20.6533		5.2	40.347						6.1	18.2439	17.6596	18.8087		6.1	51.883
			5.12	21.2902		5.12	31.703						5.22	19.6297	18.5626	20.6739		5.22	40.229						6.12	18.2611	17.6744	18.8272		6.12	52.54
			5.14	21.3458		5.14	31.378						5.24	19.6531	18.5802	20.6955		5.24	40.541						6.14	18.2784	17.6896	18.8451		6.14	54.377
			5.16	21.4002		5.16	33.359						5.26	19.6764	18.5965	20.7241		5.26	40.177						6.16	18.2954	17.7047	18.8657		6.16	54.78
			5.18	21.4537		5.18	33.764						5.28	19.7004	18.6205	20.7571		5.28	41.335						6.18	18.3126	17.717	18.8891		6.18	54.541
			5.2	21.5059		5.2	33.141						5.3	19.7242	18.6369	20.7854		5.3	41.112						6.2	18.3294	17.7282	18.913		6.2	55.437
			5.22	21.555		5.22	35.891						5.32	19.748	18.6611	20.8051		5.32	39.559						6.22	18.3457	17.7523	18.9269		6.22	55.334
			5.24	21.602		5.24	40.087						5.34	19.772	18.6957	20.8229		5.34	40.429						6.24	18.3623	17.7741	18.9377		6.24	56.928
			5.26	21.6496		5.26	38.146						5.36	19.7956	18.7243	20.8417		5.36	41.281						6.26	18.3787	17.7896	18.9492		6.26	55.999
			5.28	21.7007		5.28	34.405						5.38	19.8189	18.7442	20.8586		5.38	41.501						6.28	18.3949	17.8038	18.9614		6.28	55.776
			5.3	21.7562		5.3	32.481						5.4	19.8425	18.7702	20.8787		5.4	40.668						6.3	18.4117	17.8209	18.9746		6.3	54.12
			5.32	21.8136		5.32	29.771						5.42	19.8667	18.797	20.9006		5.42	38.614						6.32	18.4283	17.8359	18.9903		6.32	55.759
			5.34	21.8707		5.34	31.141						5.44	19.8904	18.8233	20.9271		5.44	38.852						6.34	18.445	17.8492	19.0098		6.34	54.101
			5.36	21.9269		5.36	33.016						5.46	19.9136	18.8447	20.9538		5.46	39.433						6.36	18.4615	17.8638	19.0317		6.36	54.079
			5.38	21.9826		5.38	31.284						5.48	19.9379	18.8627	20.9859		5.48	38.372						6.38	18.4781	17.8779	19.0522		6.38	48.198
			5.4	22.0384		5.4	31.942						5.5	19.9612	18.8844	21.0187		5.5	39.366						6.4	18.4947	17.8877	19.0701		6.4	49.688
			5.42	22.0943		5.42	32.84						5.52	19.9846	18.9121	21.0366		5.52	39.449						6.42	18.5112	17.9119	19.0812		6.42	49.918
			5.44	22.1508		5.44	31.084						5.54	20.0087	18.9455	21.0557		5.54	39.279						6.44	18.5282	17.9391	19.093		6.44	50.084
			5.46	22.2082		5.46	31.127						5.56	20.0327	18.9665	21.0805		5.56	39.96						6.46	18.5448	17.9605	19.1055		6.46	47.998
			5.48	22.2681		5.48	31.14						5.58	20.056	18.9883	21.1017		5.58	39.974						6.48	18.5614	17.9811	19.1213		6.48	47.005
			5.5	22.329		5.5	27.27						5.6	20.0795	19.013	21.1242		5.6	37.876						6.5	18.5783	18.0005	19.1371		6.5	43.278
			5.52	22.392		5.52	29.66						5.62	20.1031	19.0317	21.1515		5.62	37.698						6.52	18.5948	18.0199	19.1503		6.52	46.222
			5.54	22.4529		5.54	28.118						5.64	20.1266	19.0546	21.1779		5.64	38.788						6.54	18.6117	18.0319	19.1687		6.54	46.578
			5.56	22.512		5.56	30.363						5.66	20.1502	19.0682	21.2045		5.66	38.067						6.56	18.6285	18.0447	19.1855		6.56	47.24
			5.58	22.5701		5.58	32.185						5.68	20.1738	19.0891	21.2368		5.68	37.825						6.58	18.6453	18.0581	19.2045		6.58	47.447
			5.6	22.6286		5.6	29.753						5.7	20.1967	19.1032	21.2674		5.7	39.66						6.6	18.6617	18.0725	19.2228		6.6	45.464
			5.62	22.6848		5.62	29.711						5.72	20.2209	19.1332	21.2813		5.72	38.614						6.62	18.679	18.098	19.2353		6.62	48.357
			5.64	22.7362		5.64	35.99						5.74	20.2452	19.1687	21.3005		5.74	36.519						6.64	18.6956	18.119	19.2487		6.64	49.268
			5.66	22.7834		5.66	38.7						5.76	20.2688	19.1901	21.3169		5.76	37.704						6.66	18.7126	18.1386	19.2625		6.66	48.4
			5.68	22.8301		5.68	38.903						5.78	20.2927	19.2129	21.3391		5.78	39.097						6.68	18.7294	18.1555	19.2766		6.68	44.916
			5.7	22.877		5.7	37.099						5.8	20.3168	19.2333	21.3571		5.8	40.639						6.7	18.7461	18.1721	19.2933		6.7	46.725
			5.72	22.9241		5.72	38.514						5.82	20.3409	19.2551	21.3761		5.82	40.609						6.72	18.7629	18.1863	19.3101		6.72	48.538
			5.74	22.9709		5.74	38.15						5.84	20.3644	19.2779	21.3981		5.84	38.182						6.74	18.7797	18.2013	19.3254		6.74	48.202
			5.76	23.0171		5.76	37.989						5.86	20.3881	19.3004	21.4227		5.86	39.725						6.76	18.7968	18.2159	19.346		6.76	46.882
			5.78	23.0628		5.78	39.912						5.88	20.4125	19.3194	21.4538		5.88	38.523						6.78	18.8134	18.2288	19.3692		6.78	43.725
			5.8	23.1087		5.8	39.488						5.9	20.4363	19.3335	21.4818		5.9	39.316						6.8	18.83	18.2419	19.3934		6.8	45.718
			5.82	23.1577		5.82	37.492						5.92	20.4592	19.3719	21.4934		5.92	40.196						6.82	18.8467	18.2647	19.404		6.82	44.251
			5.84	23.2096		5.84	32.282						5.94	20.4822	19.3972	21.5118		5.94	41.072						6.84	18.863	18.2851	19.4143		6.84	44.338
			5.86	23.2642		5.86	33.673						5.96	20.5048	19.4206	21.534		5.96	39.42						6.86	18.8789	18.304	19.4291		6.86	43.529
			5.88	23.318		5.88	32.273						5.98	20.5277	19.4496	21.5548		5.98	39.736						6.88	18.8953	18.3206	19.4442		6.88	44.618
			5.9	23.3718		5.9	33.699						6	20.5508	19.4762	21.5738		6	38.95						6.9	18.9122	18.3346	19.4619		6.9	43.998
			5.92	23.4256		5.92	33.611						6.02	20.5733	19.4915	21.5997		6.02	38.997						6.92	18.9289	18.3493	19.4828		6.92	46.827
			5.94	23.481		5.94	32.493						6.04	20.5968	19.5157	21.626		6.04	39.738						6.94	18.9456	18.3661	19.5014		6.94	48.376
			5.96	23.5383		5.96	30.595						6.06	20.6193	19.535	21.6482		6.06	39.149						6.96	18.9625	18.3783	19.5212		6.96	47.803
			5.98	23.5978		5.98	30.574						6.08	20.6418	19.5535	21.6687		6.08	40.502						6.98	18.9792	18.3924	19.545		6.98	45.769
			6	23.6582		6	28.905						6.1	20.6649	19.5744	21.7028		6.1	39.293						7	18.9953	18.4057	19.5709		7	48.537
			6.02	23.7194		6.02	29.383						6.12	20.6884	19.6057	21.7164		6.12	38.54						7.02	19.0119	18.4298	19.5818		7.02	50.048
			6.04	23.7787		6.04	29.255						6.14	20.7122	19.6324	21.7367		6.14	40.616						7.04	19.0285	18.4534	19.5924		7.04	49.793
			6.06	23.8368		6.06	31.87						6.16	20.7361	19.6606	21.7478		6.16	41.291						7.06	19.0449	18.4722	19.6036		7.06	48.591
			6.08	23.8934		6.08	31.089						6.18	20.76	19.6883	21.7647		6.18	41.369						7.08	19.0618	18.4943	19.6195		7.08	46.543
			6.1	23.9493		6.1	31.754						6.2	20.7841	19.7166	21.7856		6.2	40.073						7.1	19.0788	18.5142	19.6336		7.1	45.732
			6.12	24.0047		6.12	33.209						6.22	20.8078	19.7387	21.8084		6.22	39.062						7.12	19.0959	18.5305	19.6494		7.12	47.989
			6.14	24.0596		6.14	31.856						6.24	20.8307	19.7627	21.8312		6.24	38.511						7.14	19.1131	18.5486	19.6678		7.14	47.302
			6.16	24.1139		6.16	32.567						6.26	20.8539	19.7857	21.8587		6.26	37.926						7.16	19.1299	18.5626	19.6884		7.16	44.914
			6.18	24.1656		6.18	34.248						6.28	20.8776	19.8043	21.881		6.28	39.11						7.18	19.1468	18.5773	19.7085		7.18	43.613
			6.2	24.2163		6.2	36.95						6.3	20.9008	19.8198	21.9058		6.3	39.436						7.2	19.1638	18.5921	19.7293		7.2	43.732
			6.22	24.2675		6.22	34.571						6.32	20.9247	19.8569	21.9235		6.32	39.273						7.22	19.1809	18.6176	19.7431		7.22	43.051
			6.24	24.3197		6.24	33.221						6.34	20.9493	19.8922	21.9428		6.34	39.211						7.24	19.1982	18.6386	19.7603		7.24	42.83
			6.26	24.3699		6.26	34.889						6.36	20.9727	19.9242	21.9643		6.36	38.317						7.26	19.2158	18.6585	19.7731		7.26	42.953
			6.28	24.4178		6.28	38.809						6.38	20.9964	19.9497	21.984		6.38	38.155						7.28	19.2331	18.6783	19.7847		7.28	42.596
			6.3	24.4672		6.3	38.26						6.4	21.0203	19.981	22.0036		6.4	37.637						7.3	19.2503	18.6962	19.8017		7.3	42.955
			6.32	24.5199		6.32	31.401						6.42	21.0443	20.0052	22.0268		6.42	38.029						7.32	19.2677	18.7115	19.8178		7.32	44.75
			6.34	24.5762		6.34	32.102						6.44	21.0679	20.0261	22.0504		6.44	37.741						7.34	19.285	18.7255	19.8325		7.34	44.282
			6.36	24.6328		6.36	31.845						6.46	21.092	20.0527	22.0735		6.46	37.768						7.36	19.3022	18.7412	19.8494		7.36	43.818
			6.38	24.6916		6.38	30.739						6.48	21.1157	20.0724	22.1044		6.48	40.135						7.38	19.3194	18.7534	19.8711		7.38	44.201
			6.4	24.754		6.4	28.653						6.5	21.1397	20.0909	22.1315		6.5	41.275						7.4	19.3367	18.7691	19.892		7.4	43.911
			6.42	24.819		6.42	26.464						6.52	21.1635	20.1315	22.1495		6.52	41.527						7.42	19.3541	18.7885	19.9053		7.42	44.073
			6.44	24.8827		6.44	27.442						6.54	21.1869	20.1619	22.1698		6.54	40.209						7.44	19.3722	18.8119	19.9223		7.44	45.854
			6.46	24.9436		6.46	30.24						6.56	21.2102	20.1939	22.1873		6.56	38.512						7.46	19.39	18.8319	19.9378		7.46	45.606
			6.48	25.0025		6.48	30.341						6.58	21.2335	20.223	22.2096		6.58	36.604						7.48	19.408	18.8505	19.9535		7.48	45.352
			6.5	25.0615		6.5	30.55						6.6	21.2574	20.2499	22.2329		6.6	39.789						7.5	19.426	18.8687	19.9726		7.5	42.6
			6.52	25.1196		6.52	29.991						6.62	21.2803	20.2766	22.2539		6.62	38.102						7.52	19.4439	18.8858	19.9889		7.52	45.845
			6.54	25.1758		6.54	31.694						6.64	21.3038	20.2997	22.2827		6.64	36.578						7.54	19.4617	18.8994	20.008		7.54	46.79
			6.56	25.2307		6.56	33.714						6.66	21.3274	20.3179	22.3083		6.66	36.957						7.56	19.4797	18.9136	20.0311		7.56	45.652
			6.58	25.2849		6.58	32.408						6.68	21.3513	20.3403	22.3385		6.68	38.189						7.58	19.4978	18.9276	20.0542		7.58	46.107
			6.6	25.3398		6.6	32.734						6.7	21.3741	20.3628	22.3606		6.7	39.854						7.6	19.5154	18.936	20.0783		7.6	45.422
			6.62	25.3951		6.62	32.506						6.72	21.3976	20.3959	22.3787		6.72	38.663						7.62	19.533	18.9627	20.0915		7.62	48.817
			6.64	25.4497		6.64	31.848						6.74	21.4213	20.4307	22.3942		6.74	38.397						7.64	19.5502	18.9877	20.1053		7.64	48.329
			6.66	25.5033		6.66	33.727						6.76	21.4449	20.4612	22.4166		6.76	39.376						7.66	19.5675	19.0085	20.1206		7.66	48.373
			6.68	25.5569		6.68	34.512						6.78	21.4684	20.4867	22.4354		6.78	38.848						7.68	19.5849	19.0307	20.1357		7.68	47.966
			6.7	25.6122		6.7	31.845						6.8	21.4924	20.5174	22.4552		6.8	39.291						7.7	19.6025	19.0488	20.1533		7.7	48.958
			6.72	25.6701		6.72	30.583						6.82	21.5159	20.5415	22.4769		6.82	37.882						7.72	19.62	19.0662	20.1704		7.72	51.017
			6.74	25.7259		6.74	30.221						6.84	21.5391	20.5636	22.5		6.84	39.34						7.74	19.6371	19.0838	20.1878		7.74	49.861
			6.76	25.7775		6.76	35.339						6.86	21.5631	20.5822	22.5215		6.86	40.07						7.76	19.6544	19.0975	20.2089		7.76	50.386
			6.78	25.8258		6.78	38.382						6.88	21.5867	20.6015	22.5453		6.88	40.765						7.78	19.6718	19.1118	20.2267		7.78	50.872
			6.8	25.8732		6.8	37.204						6.9	21.6099	20.616	22.5736		6.9	35.351						7.8	19.6892	19.1235	20.2465		7.8	49.595
			6.82	25.9231		6.82	37.652						6.92	21.6339	20.6471	22.5946		6.92	36.271						7.82	19.7045	19.1495	20.2554		7.82	52.753
			6.84	25.9747		6.84	32.584						6.94	21.6576	20.6827	22.6151		6.94	36.69						7.84	19.7198	19.1704	20.2706		7.84	54.809
			6.86	26.0271		6.86	33.587						6.96	21.6816	20.7107	22.6386		6.96	36.263						7.86	19.7355	19.1907	20.2832		7.86	54.939
			6.88	26.0778		6.88	36.14						6.98	21.7051	20.7359	22.664		6.98	37.087						7.88	19.751	19.205	20.2965		7.88	52.525
			6.9	26.1296		6.9	36.169						7	21.7286	20.7562	22.685		7	39.052						7.9	19.7664	19.2204	20.3119		7.9	53.594
			6.92	26.1851		6.92	31.266						7.02	21.7526	20.7752	22.7131		7.02	38.334						7.92	19.782	19.2329	20.326		7.92	57.975
			6.94	26.2438		6.94	29.16						7.04	21.7765	20.7948	22.7382		7.04	37.709						7.94	19.7973	19.2464	20.3395		7.94	57.064
			6.96	26.3047		6.96	30.901						7.06	21.8005	20.8095	22.7712		7.06	35.55						7.96	19.8127	19.2589	20.3576		7.96	54.663
			6.98	26.3661		6.98	27.985						7.08	21.8235	20.8266	22.8007		7.08	36.821						7.98	19.8278	19.268	20.3745		7.98	50.371
			7	26.4259		7	28.432						7.1	21.8471	20.8446	22.8316		7.1	36.429						8	19.8433	19.2775	20.394		8	51.67
			7.02	26.4829		7.02	33.23						7.12	21.8708	20.8743	22.8554		7.12	34.956						8.02	19.8583	19.2968	20.4056		8.02	52.9
			7.04	26.5372		7.04	32.407						7.14	21.8945	20.9061	22.878		7.14	35.802						8.04	19.8734	19.3148	20.4195		8.04	52.6
			7.06	26.5909		7.06	33.25						7.16	21.9185	20.9339	22.902		7.16	34.947						8.06	19.8881	19.3293	20.4298		8.06	50
			7.08	26.6441		7.08	34.181						7.18	21.942	20.9568	22.9232		7.18	35.047						8.08	19.9033	19.3445	20.4456		8.08	54.5
			7.1	26.6969		7.1	33.41						7.2	21.9665	20.9817	22.9515		7.2	37.778						8.1	19.9182	19.3609	20.4618		8.1	54
			7.12	26.7501		7.12	33.89						7.22	21.9901	21.0024	22.9756		7.22	38.075						8.12	19.9332	19.3732	20.4818		8.12	51.1
			7.14	26.8039		7.14	33.419						7.24	22.0136	21.029	23.004		7.24	38.33						8.14	19.9479	19.3876	20.4958		8.14	48.8
			7.16	26.8582		7.16	32.526						7.26	22.0368	21.0472	23.0351		7.26	39.356						8.16	19.9628	19.4034	20.512		8.16	47.8
			7.18	26.9134		7.18	32.653						7.28	22.0606	21.0639	23.0678		7.28	39.808						8.18	19.9776	19.417	20.5335		8.18	47.6
			7.2	26.9702		7.2	32.052						7.3	22.0828	21.0818	23.1028		7.3	38.455						8.2	19.9922	19.4289	20.5516		8.2	47.6
			7.22	27.0284		7.22	29.697						7.32	22.1078	21.1076	23.1228		7.32	38.868						8.22	20.0069	19.4548	20.562		8.22	44.3
			7.24	27.0875		7.24	30.391						7.34	22.133	21.133	23.146		7.34	40.877						8.24	20.0212	19.4755	20.5733		8.24	44.5
			7.26	27.1457		7.26	30.584						7.36	22.158	21.1555	23.1683		7.36	41.118						8.26	20.0361	19.4922	20.5836		8.26	42.9
			7.28	27.2039		7.28	31.202						7.38	22.1825	21.1763	23.1927		7.38	41.592						8.28	20.051	19.5103	20.5951		8.28	42.6
			7.3	27.2603		7.3	30.37						7.4	22.208	21.1996	23.222		7.4	40.656						8.3	20.066	19.5247	20.6083		8.3	42.6
			7.32	27.3137		7.32	33.505						7.42	22.2329	21.2185	23.2443		7.42	40.702						8.32	20.081	19.5388	20.6271		8.32	42.3
			7.34	27.3635		7.34	36.612						7.44	22.2576	21.2337	23.2766		7.44	38.016						8.34	20.0961	19.5531	20.6396		8.34	41.8
			7.36	27.4122		7.36	37.526						7.46	22.2827	21.2543	23.3067		7.46	36.957						8.36	20.1112	19.5657	20.6575		8.36	41.6
			7.38	27.4613		7.38	36.022						7.48	22.3072	21.2718	23.3367		7.48	37.244						8.38	20.1259	19.5762	20.6751		8.38	41.9
			7.4	27.5109		7.4	35.62						7.5	22.3321	21.2849	23.3696		7.5	38.06						8.4	20.1405	19.5885	20.6923		8.4	41.8
			7.42	27.5595		7.42	36.468						7.52	22.3566	21.3202	23.3932		7.52	38.776						8.42	20.1566	19.6108	20.7054		8.42	41.3
			7.44	27.6071		7.44	38.19						7.54	22.3804	21.3444	23.417		7.54	40.305						8.44	20.1726	19.6326	20.7179		8.44	40.2
			7.46	27.655		7.46	38.002						7.56	22.4044	21.3683	23.4402		7.56	39.086						8.46	20.1891	19.6522	20.73		8.46	40
			7.48	27.7034		7.48	35.82						7.58	22.428	21.3863	23.4703		7.58	39.12						8.48	20.2051	19.6726	20.7438		8.48	40.9
			7.5	27.7535		7.5	36.96						7.6	22.4523	21.4054	23.4925		7.6	38.986						8.5	20.2211	19.6891	20.758		8.5	42.4
			7.52	27.8031		7.52	34.347						7.62	22.4765	21.4263	23.5174		7.62	39.167						8.52	20.2375	19.7031	20.772		8.52	40.2
			7.54	27.8534		7.54	36.773						7.64	22.501	21.4479	23.5505		7.64	39.131						8.54	20.2538	19.718	20.7884		8.54	40.4
			7.56	27.9036		7.56	35.428						7.66	22.5256	21.4702	23.5819		7.66	39.696						8.56	20.2701	19.7331	20.804		8.56	40.6
			7.58	27.9562		7.58	34.697						7.68	22.5503	21.4854	23.6181		7.68	40.031						8.58	20.286	19.7461	20.8247		8.58	40.8
			7.6	28.0107		7.6	31.698						7.7	22.5746	21.5035	23.6555		7.7	41.324						8.6	20.3018	19.7569	20.8417		8.6	40.1
			7.62	28.0664		7.62	32.085						7.72	22.598	21.5368	23.6712		7.72	41.667						8.62	20.3178	19.7781	20.8563		8.62	43
			7.64	28.1195		7.64	32.474						7.74	22.6221	21.5659	23.687		7.74	41.801						8.64	20.3345	19.8004	20.8687		8.64	42.2
			7.66	28.1706		7.66	36.444						7.76	22.6449	21.5928	23.7049		7.76	42.005						8.66	20.351	19.8191	20.8827		8.66	41.7
			7.68	28.2202		7.68	36.043						7.78	22.6683	21.6144	23.7243		7.78	41.394						8.68	20.3677	19.8363	20.8974		8.68	41.4
			7.7	28.2713		7.7	35.571						7.8	22.6921	21.6382	23.7406		7.8	42.605						8.7	20.3843	19.8541	20.9144		8.7	42
			7.72	28.3239		7.72	33.277						7.82	22.7143	21.6548	23.7619		7.82	42.109						8.72	20.4008	19.8697	20.9304		8.72	40.9
			7.74	28.3778		7.74	33.165						7.84	22.7373	21.6744	23.7842		7.84	38.029						8.74	20.4175	19.8846	20.9507		8.74	41.7
			7.76	28.4333		7.76	33.012						7.86	22.7609	21.6922	23.8074		7.86	40.025						8.76	20.434	19.9003	20.9733		8.76	40.9
			7.78	28.4911		7.78	30.541						7.88	22.7846	21.715	23.8399		7.88	39.746						8.78	20.4499	19.9114	20.9956		8.78	41.5
			7.8	28.5523		7.8	29.265						7.9	22.8074	21.7298	23.8628		7.9	39.473						8.8	20.4657	19.9232	21.0168		8.8	41
			7.82	28.6153		7.82	27.809						7.92	22.8306	21.7641	23.8816		7.92	40.386						8.82	20.4822	19.944	21.0289		8.82	40.7
			7.84	28.6778		7.84	28.045						7.94	22.8553	21.7949	23.9059		7.94	40.082						8.84	20.4984	19.9629	21.0413		8.84	38.9
			7.86	28.7396		7.86	29.948						7.96	22.8799	21.8227	23.9215		7.96	40.757						8.86	20.5149	19.9815	21.0566		8.86	39.8
			7.88	28.8016		7.88	28.744						7.98	22.9046	21.8496	23.9462		7.98	39.75						8.88	20.5315	19.9985	21.0695		8.88	39.5
			7.9	28.8636		7.9	27.841						8	22.9288	21.8765	23.9684		8	40.433						8.9	20.5475	20.0136	21.0856		8.9	39.5
			7.92	28.9236		7.92	29.9						8.02	22.9532	21.897	23.9939		8.02	40.848						8.92	20.5638	20.0286	21.1001		8.92	41.6
			7.94	28.9821		7.94	31.536						8.04	22.9783	21.9207	24.026		8.04	41.064						8.94	20.5805	20.0439	21.1186		8.94	41.5
			7.96	29.0399		7.96	30.284						8.06	23.0027	21.9508	24.058		8.06	40.839						8.96	20.5968	20.0569	21.1365		8.96	42.9
			7.98	29.0977		7.98	30.934						8.08	23.028	21.9703	24.0881		8.08	39.56						8.98	20.613	20.0691	21.1604		8.98	43.9
			8	29.1542		8	31.633						8.1	23.0523	21.9879	24.1221		8.1	39.791						9	20.6292	20.0813	21.1842		9	43.3
			8.02	29.21		8.02	32.364						8.12	23.0769	22.0165	24.1398		8.12	38.095						9.02	20.6447	20.0986	21.197		9.02	39
			8.04	29.2657		8.04	31.957						8.14	23.1015	22.0445	24.1619		8.14	37.184						9.04	20.6602	20.114	21.2108		9.04	41.3
			8.06	29.3216		8.06	31.988						8.16	23.1261	22.0722	24.1801		8.16	37.189						9.06	20.6758	20.1321	21.2235		9.06	41.9
			8.08	29.3783		8.08	31.944						8.18	23.1499	22.0991	24.1976		8.18	38.343						9.08	20.6914	20.1509	21.2398		9.08	42.1
			8.1	29.4346		8.1	30.706						8.2	23.174	22.1284	24.2212		8.2	40.387						9.1	20.7068	20.1667	21.256		9.1	41.9
			8.12	29.4908		8.12	32.662						8.22	23.1982	22.1521	24.2495		8.22	40.701						9.12	20.7222	20.1803	21.2761		9.12	41.4
			8.14	29.5469		8.14	32.025						8.24	23.223	22.1731	24.2706		8.24	41.539						9.14	20.7377	20.1911	21.2886		9.14	43
			8.16	29.6038		8.16	30.874						8.26	23.2471	22.1969	24.2989		8.26	39.966						9.16	20.7529	20.1999	21.3118		9.16	43.2
			8.18	29.6612		8.18	31.307						8.28	23.2719	22.2169	24.3237		8.28	39.691						9.18	20.7682	20.2116	21.3318		9.18	42.8
			8.2	29.7189		8.2	31.212						8.3	23.2958	22.2356	24.348		8.3	39.141						9.2	20.7835	20.2236	21.3527		9.2	43.5
			8.22	29.7768		8.22	30.481						8.32	23.3193	22.2636	24.3703		8.32	39.557						9.22	20.7978	20.2432	21.3639		9.22	43.8
			8.24	29.8335		8.24	30.921						8.34	23.3422	22.2983	24.3894		8.34	39.109						9.24	20.8122	20.2571	21.3761		9.24	43.6
			8.26	29.889		8.26	33.261						8.36	23.3657	22.3258	24.4106		8.36	36.528						9.26	20.8273	20.2731	21.3904		9.26	44
			8.28	29.944		8.28	32.323						8.38	23.3889	22.353	24.4364		8.38	37.928						9.28	20.8421	20.2875	21.404		9.28	42.5
			8.3	30		8.3	31.992						8.4	23.4125	22.3803	24.4604		8.4	36.774						9.3	20.8569	20.3006	21.4219		9.3	43.3
			8.32	30.0478		8.32	31.421						8.42	23.436	22.4022	24.4823		8.42	38.398						9.32	20.8719	20.3121	21.4376		9.32	38.9
			8.34	30.0943		8.34	33.385						8.44	23.4604	22.4209	24.515		8.44	38.66						9.34	20.8864	20.3245	21.4538		9.34	38.7
			8.36	30.1401		8.36	31.958						8.46	23.4846	22.4472	24.5457		8.46	38.212						9.36	20.9012	20.3363	21.471		9.36	39.3
			8.38	30.1857		8.38	32.865						8.48	23.5083	22.4629	24.5761		8.48	38.395						9.38	20.9161	20.3475	21.4904		9.38	36.1
			8.4	30.2313		8.4	34.017						8.5	23.5322	22.4783	24.6107		8.5	38.709						9.4	20.9306	20.3584	21.5107		9.4	37.6
			8.42	30.279		8.42	31.886						8.52	23.5559	22.509	24.6266		8.52	36.823						9.42	20.946	20.3789	21.5216		9.42	36
			8.44	30.329		8.44	28.556						8.54	23.58	22.5408	24.6434		8.54	36.675						9.44	20.9613	20.3956	21.5349		9.44	36.9
			8.46	30.3823		8.46	29.562						8.56	23.6039	22.5654	24.662		8.56	36.518						9.46	20.9768	20.412	21.5468		9.46	38.7
			8.48	30.436		8.48	26.336						8.58	23.6279	22.5948	24.6815		8.58	35.976						9.48	20.992	20.429	21.5608		9.48	38.6
			8.5	30.4912		8.5	27.905						8.6	23.6518	22.6168	24.7052		8.6	36.996						9.5	21.0075	20.4423	21.579		9.5	37.4
			8.52	30.5452		8.52	27.337						8.62	23.6765	22.6447	24.7282		8.62	37.834						9.52	21.0229	20.4553	21.595		9.52	38.3
			8.54	30.5989		8.54	28.263						8.64	23.7003	22.6674	24.7515		8.64	39.052						9.54	21.038	20.4671	21.6113		9.54	36.7
			8.56	30.6507		8.56	28.132						8.66	23.7244	22.6867	24.7774		8.66	39.75						9.56	21.0532	20.4782	21.6303		9.56	37.5
			8.58	30.7018		8.58	30.567						8.68	23.7484	22.7078	24.8078		8.68	38.454						9.58	21.068	20.4878	21.647		9.58	39.3
			8.6	30.7522		8.6	29.478						8.7	23.7722	22.7257	24.8391		8.7	38.091						9.6	21.0833	20.4999	21.6662		9.6	39.6
			8.62	30.8029		8.62	29.319						8.72	23.7968	22.7593	24.8564		8.72	38.318						9.62	21.0988	20.52	21.6759		9.62	38.6
			8.64	30.8533		8.64	29.887						8.74	23.8205	22.7895	24.8804		8.74	37.556						9.64	21.1143	20.5366	21.69		9.64	40.2
			8.66	30.9037		8.66	30.121						8.76	23.8442	22.8159	24.8991		8.76	39.753						9.66	21.13	20.5528	21.7022		9.66	39.4
			8.68	30.9539		8.68	29.485						8.78	23.8687	22.8437	24.9167		8.78	40.501						9.68	21.1453	20.5702	21.7144		9.68	41.6
			8.7	31.0042		8.7	29.949						8.8	23.8924	22.8715	24.9372		8.8	39.805						9.7	21.1609	20.5859	21.7306		9.7	39.2
			8.72	31.0548		8.72	30.107						8.82	23.9166	22.8963	24.9574		8.82	37.609						9.72	21.1759	20.5964	21.7462		9.72	39.2
			8.74	31.1053		8.74	28.874						8.84	23.9401	22.9213	24.9804		8.84	38.05						9.74	21.1909	20.6129	21.7648		9.74	39.2
			8.76	31.1553		8.76	30.325						8.86	23.9643	22.9413	25.0085		8.86	38.631						9.76	21.2057	20.6232	21.7814		9.76	39.9
			8.78	31.2063		8.78	30.767						8.88	23.9879	22.9634	25.0278		8.88	39.978						9.78	21.2208	20.635	21.8028		9.78	38.1
			8.8	31.2594		8.8	27.268						8.9	24.0117	22.9863	25.0543		8.9	39.616						9.8	21.2359	20.6477	21.8215		9.8	38.7
			8.82	31.3137		8.82	26.788						8.92	24.0357	23.0171	25.0749		8.92	39.914						9.82	21.2496	20.6649	21.833		9.82	38.5
			8.84	31.3664		8.84	28.774						8.94	24.0595	23.0531	25.0955		8.94	38.279						9.84	21.2636	20.6812	21.8447		9.84	37.5
			8.86	31.417		8.86	29.946						8.96	24.0841	23.0894	25.1176		8.96	37.931						9.86	21.2774	20.6972	21.8552		9.86	37.7
			8.88	31.4673		8.88	30.27						8.98	24.1088	23.1214	25.1378		8.98	37.753						9.88	21.2916	20.7105	21.869		9.88	40.1
			8.9	31.5171		8.9	29.319						9	24.1329	23.1488	25.1596		9	36.905						9.9	21.3052	20.7246	21.8827		9.9	40.9
			8.92	31.5673		8.92	30.703						9.02	24.1567	23.174	25.1799		9.02	37.417						9.92	21.3194	20.739	21.8976		9.92	42.1
			8.94	31.6166		8.94	29.828						9.04	24.181	23.1989	25.2092		9.04	38.208						9.94	21.3332	20.7511	21.9109		9.94	43.3
			8.96	31.6671		8.96	30.783						9.06	24.2056	23.2233	25.2311		9.06	38.678						9.96	21.3474	20.7641	21.9272		9.96	44.3
			8.98	31.7193		8.98	28.48						9.08	24.2297	23.2377	25.2547		9.08	37.182						9.98	21.3614	20.7773	21.941		9.98	43
			9	31.7748		9	27.065						9.1	24.2545	23.2617	25.2794		9.1	37.236						10	21.3755	20.7865	21.9606		10	41.5
			9.02	31.8316		9.02	25.475						9.12	24.2823	23.2979	25.3005		9.12	36.605						10.02	21.3879	20.8041	21.9695		10.02	42.3
			9.04	31.8892		9.04	26.831						9.14	24.3098	23.3298	25.329		9.14	36.298						10.04	21.4008	20.8192	21.9799		10.04	42
			9.06	31.9457		9.06	25.784						9.16	24.3373	23.365	25.3476		9.16	36.445						10.06	21.4138	20.8343	21.9896		10.06	41.9
			9.08	32.0035		9.08	27.071						9.18	24.3646	23.3983	25.3749		9.18	37.152						10.08	21.4264	20.8466	22.0035		10.08	41.7
			9.1	32.0619		9.1	25.101						9.2	24.392	23.4217	25.4036		9.2	37.618						10.1	21.4398	20.8596	22.0147		10.1	42.4
			9.12	32.1187		9.12	24.947						9.22	24.4199	23.451	25.4344		9.22	36.707						10.12	21.4528	20.8727	22.0282		10.12	41.1
			9.14	32.1722		9.14	29.202						9.24	24.4482	23.4738	25.4653		9.24	36.66						10.14	21.4661	20.885	22.0424		10.14	40.7
			9.16	32.2222		9.16	29.931						9.26	24.4762	23.495	25.4979		9.26	36.704						10.16	21.4792	20.8945	22.0573		10.16	39.4
			9.18	32.2699		9.18	31.007						9.28	24.5036	23.5141	25.5348		9.28	36.248						10.18	21.4926	20.9055	22.0742		10.18	40
			9.2	32.3162		9.2	33.465						9.3	24.5313	23.5319	25.573		9.3	37.049						10.2	21.5058	20.9151	22.0901		10.2	39.7
			9.22	32.362		9.22	32.844						9.32	24.559	23.5698	25.5938		9.32	36.083						10.22	21.5186	20.9337	22.1022		10.22	39.8
			9.24	32.4079		9.24	31.934						9.34	24.5866	23.6022	25.6153		9.34	35.848						10.24	21.5315	20.9494	22.1126		10.24	40.5
			9.26	32.4542		9.26	33.402						9.36	24.6146	23.6342	25.6362		9.36	36.226						10.26	21.5442	20.9628	22.1203		10.26	41.7
			9.28	32.5016		9.28	31.744						9.38	24.6424	23.6583	25.6618		9.38	37.024						10.28	21.5571	20.9783	22.1338		10.28	40.7
			9.3	32.5514		9.3	29.982						9.4	24.6705	23.6855	25.6844		9.4	38.206						10.3	21.5702	20.9907	22.1445		10.3	41.7
			9.32	32.6014		9.32	28.649						9.42	24.6989	23.7092	25.7091		9.42	38.851						10.32	21.5832	21.0027	22.1587		10.32	39.4
			9.34	32.6518		9.34	31.331						9.44	24.7262	23.7294	25.7409		9.44	38.929						10.34	21.5962	21.0148	22.1735		10.34	40.8
			9.36	32.7023		9.36	29.404						9.46	24.7547	23.7514	25.7731		9.46	39.974						10.36	21.6091	21.0276	22.1848		10.36	40.1
			9.38	32.7555		9.38	28.408						9.48	24.7824	23.7677	25.8029		9.48	40.023						10.38	21.6221	21.0406	22.1994		10.38	39.4
			9.4	32.8093		9.4	26.957						9.5	24.8104	23.7879	25.8406		9.5	40.984						10.4	21.6351	21.0498	22.2176		10.4	39.9
			9.42	32.8632		9.42	28.316						9.52	24.8389	23.8284	25.8656		9.52	39.709						10.42	21.6476	21.0679	22.2275		10.42	39.3
			9.44	32.9164		9.44	28.191						9.54	24.8663	23.8601	25.8854		9.54	37.674						10.44	21.6602	21.0814	22.2369		10.44	39.7
			9.46	32.9711		9.46	28.156						9.56	24.894	23.8963	25.9104		9.56	37.261						10.46	21.6729	21.0952	22.2468		10.46	38.9
			9.48	33.0258		9.48	25.978						9.58	24.9217	23.9262	25.9365		9.58	36.466						10.48	21.6856	21.1102	22.2568		10.48	40
			9.5	33.0806		9.5	28.178						9.6	24.95	23.9495	25.9628		9.6	36.245						10.5	21.6982	21.1231	22.2704		10.5	40.3
			9.52	33.1336		9.52	27.975						9.62	24.9774	23.9769	25.9889		9.62	37.257						10.52	21.7113	21.1377	22.2842		10.52	48.6
			9.54	33.1852		9.54	28.901						9.64	25.0055	24.0051	26.0162		9.64	37.477						10.54	21.7239	21.147	22.296		10.54	46
			9.56	33.2349		9.56	30.242						9.66	25.0337	24.0296	26.0479		9.66	36.069						10.56	21.7368	21.1567	22.3096		10.56	46.1
			9.58	33.2832		9.58	31.474						9.68	25.0612	24.0507	26.0824		9.68	34.88						10.58	21.7496	21.1669	22.3242		10.58	46.9
			9.6	33.3318		9.6	31.568						9.7	25.0891	24.0722	26.1153		9.7	35.423						10.6	21.7623	21.1775	22.3369		10.6	45.5
			9.62	33.3816		9.62	29.59						9.72	25.1168	24.1132	26.1371		9.72	35.256						10.62	21.7757	21.1947	22.3489		10.62	46.1
			9.64	33.4334		9.64	29.361						9.74	25.1445	24.1506	26.1569		9.74	34.635						10.64	21.7885	21.2124	22.3585		10.64	47.1
			9.66	33.4862		9.66	27.881						9.76	25.1722	24.1832	26.1849		9.76	35.735						10.66	21.8015	21.227	22.3699		10.66	46.2
			9.68	33.5389		9.68	28.04						9.78	25.1994	24.2159	26.2045		9.78	37.023						10.68	21.8147	21.24	22.3832		10.68	47.1
			9.7	33.5914		9.7	29.608						9.8	25.2272	24.2462	26.2331		9.8	35.984						10.7	21.8284	21.2541	22.3971		10.7	46.8
			9.72	33.6436		9.72	28.063						9.82	25.2549	24.2665	26.2597		9.82	36.005						10.72	21.8417	21.2671	22.4139		10.72	47.1
			9.74	33.6943		9.74	28.511						9.84	25.2828	24.2914	26.2886		9.84	35.511						10.74	21.8549	21.2801	22.4294		10.74	46.4
			9.76	33.742		9.76	32.273						9.86	25.3108	24.3149	26.3228		9.86	35.173						10.76	21.8679	21.2907	22.4464		10.76	47.9
			9.78	33.7884		9.78	33.631						9.88	25.3383	24.3401	26.3579		9.88	36.844						10.78	21.8814	21.3008	22.4615		10.78	47.4
			9.8	33.835		9.8	31.046						9.9	25.366	24.3609	26.4		9.9	35.141						10.8	21.8947	21.3104	22.4812		10.8	47.7
			9.82	33.8817		9.82	31.973						9.92	25.3941	24.3973	26.4222		9.92	34.108						10.82	21.9082	21.3283	22.4884		10.82	39.2
			9.84	33.928		9.84	33.373						9.94	25.4226	24.4323	26.4455		9.94	34.04						10.84	21.9218	21.3468	22.4984		10.84	38.4
			9.86	33.9749		9.86	32.081						9.96	25.4504	24.4633	26.4681		9.96	35.5						10.86	21.9353	21.3626	22.5106		10.86	39.8
			9.88	34.0235		9.88	30.515						9.98	25.4783	24.4921	26.4919		9.98	35.929						10.88	21.9489	21.3771	22.5237		10.88	41.7
			9.9	34.0726		9.9	30.007						10	25.5066	24.5226	26.5217		10	35.639						10.9	21.9626	21.3906	22.5362		10.9	40.2
			9.92	34.1199		9.92	31.185						10.02	25.5346	24.5466	26.5484		10.02	34.506						10.92	21.976	21.4017	22.5466		10.92	39.7
			9.94	34.166		9.94	34.09						10.04	25.5629	24.5761	26.5724		10.04	34.584						10.94	21.9899	21.4139	22.5601		10.94	39
			9.96	34.2108		9.96	32.349						10.06	25.5912	24.5995	26.5968		10.06	34.503						10.96	22.0034	21.428	22.5775		10.96	40.8
			9.98	34.2576		9.98	34.019						10.08	25.6191	24.6208	26.6295		10.08	33.751						10.98	22.0169	21.4385	22.5931		10.98	39.4
			10	34.3053		10	29.811						10.1	25.6468	24.6452	26.6661		10.1	35.938						11	22.0308	21.4476	22.6142		11	40.3
			10.02	34.3534		10.02	30.66						10.12	25.6748	24.6813	26.6906		10.12	36.457						11.02	22.0442	21.4629	22.6241		11.02	40.8
			10.04	34.3998		10.04	33.015						10.14	25.7033	24.7139	26.7132		10.14	36.427						11.04	22.0575	21.4794	22.6343		11.04	41.5
			10.06	34.4448		10.06	33.394						10.16	25.7309	24.7458	26.7365		10.16	34.958						11.06	22.0707	21.4951	22.643		11.06	40.6
			10.08	34.4915		10.08	33.608						10.18	25.7592	24.7759	26.7616		10.18	35.472						11.08	22.0844	21.5097	22.6565		11.08	40.9
			10.1	34.5414		10.1	29.556						10.2	25.7871	24.7995	26.7851		10.2	35.49						11.1	22.0982	21.5227	22.6723		11.1	41.1
			10.12	34.5939		10.12	27.115						10.22	25.8157	24.8205	26.8201		10.22	35.458						11.12	22.1114	21.5344	22.685		11.12	41.5
			10.14	34.6459		10.14	28.991						10.24	25.8435	24.8398	26.8502		10.24	33.573						11.14	22.125	21.5471	22.7018		11.14	39.9
			10.16	34.6965		10.16	30.564						10.26	25.8715	24.862	26.8886		10.26	32.807						11.16	22.139	21.5598	22.7165		11.16	41.5
			10.18	34.7475		10.18	29.44						10.28	25.8985	24.8804	26.9226		10.28	35.984						11.18	22.1524	21.5714	22.7303		11.18	40.3
			10.2	34.7995		10.2	28.25						10.3	25.9266	24.8976	26.9551		10.3	35.345						11.2	22.1658	21.5785	22.7466		11.2	39.4
			10.22	34.852		10.22	28.836						10.32	25.9549	24.9363	26.9778		10.32	34.565						11.22	22.1793	21.5958	22.7556		11.22	41.1
			10.24	34.9035		10.24	28.703						10.34	25.9837	24.9713	26.994		10.34	34.356						11.24	22.1925	21.6142	22.7679		11.24	40.1
			10.26	34.9544		10.26	29.949						10.36	26.0127	25.0071	27.022		10.36	34.021						11.26	22.2063	21.6304	22.7804		11.26	40.6
			10.28	35.0063		10.28	29.691						10.38	26.0409	25.0404	27.0539		10.38	32.976						11.28	22.2198	21.648	22.7919		11.28	39.8
			10.3	35.0601		10.3	27.196						10.4	26.0705	25.074	27.0876		10.4	33.968						11.3	22.2333	21.6619	22.803		11.3	41.5
			10.32	35.1156		10.32	26.754						10.42	26.0991	25.1009	27.1233		10.42	33.244						11.32	22.2467	21.6746	22.8167		11.32	40.6
			10.34	35.1711		10.34	27.236						10.44	26.1287	25.1324	27.1557		10.44	34.491						11.34	22.2602	21.6854	22.8299		11.34	40
			10.36	35.226		10.36	27.206						10.46	26.1578	25.1555	27.1942		10.46	36.986						11.36	22.2734	21.696	22.8457		11.36	41.3
			10.38	35.2811		10.38	27.434						10.48	26.1877	25.1776	27.2319		10.48	35.976						11.38	22.2871	21.7092	22.8623		11.38	40.7
			10.4	35.337		10.4	27.159						10.5	26.2171	25.2003	27.279		10.5	35.051						11.4	22.3006	21.7174	22.8792		11.4	41.8
			10.42	35.3935		10.42	25.9						10.52	26.2453	25.2402	27.2993		10.52	35.149						11.42	22.3146	21.7379	22.8893		11.42	42.1
			10.44	35.4491		10.44	26.722						10.54	26.2749	25.2757	27.316		10.54	36.677						11.44	22.3283	21.7527	22.9013		11.44	43.1
			10.46	35.5032		10.46	28.3						10.56	26.3038	25.3095	27.3383		10.56	34.566						11.46	22.3421	21.7686	22.9124		11.46	42.2
			10.48	35.5573		10.48	28.212						10.58	26.3332	25.3433	27.3633		10.58	35.866						11.48	22.356	21.7832	22.9255		11.48	43.1
			10.5	35.6132		10.5	26.76						10.6	26.3623	25.3699	27.3853		10.6	35.242						11.5	22.3698	21.7946	22.9364		11.5	41.4
			10.52	35.6687		10.52	25.62						10.62	26.3916	25.3984	27.4136		10.62	33.701						11.52	22.3837	21.8086	22.9492		11.52	43.4
			10.54	35.7224		10.54	28.621						10.64	26.4214	25.4257	27.45		10.64	33.902						11.54	22.3979	21.8206	22.9648		11.54	41.1
			10.56	35.773		10.56	29.748						10.66	26.4506	25.4488	27.4815		10.66	33.368						11.56	22.4116	21.832	22.9815		11.56	42.7
			10.58	35.8232		10.58	30.487						10.68	26.4796	25.4703	27.5215		10.68	34.321						11.58	22.4256	21.8442	22.9994		11.58	42.3
			10.6	35.8731		10.6	29.459						10.7	26.5094	25.4881	27.5619		10.7	34.14						11.6	22.4392	21.8523	23.0171		11.6	44
			10.62	35.9229		10.62	30.326						10.72	26.5374	25.5294	27.5821		10.72	34.085						11.62	22.4533	21.8694	23.028		11.62	41.3
			10.64	35.9707		10.64	30.556						10.74	26.5648	25.5656	27.6044		10.74	33.358						11.64	22.4675	21.888	23.0412		11.64	41
			10.66	36.0175		10.66	33.354						10.76	26.5928	25.5983	27.6261		10.76	31.722						11.66	22.4818	21.9037	23.0541		11.66	42.9
			10.68	36.0638		10.68	32.302						10.78	26.6203	25.6321	27.6485		10.78	32.292						11.68	22.4956	21.916	23.0668		11.68	40.2
			10.7	36.1112		10.7	31.692						10.8	26.6489	25.6632	27.6739		10.8	34.332						11.7	22.5094	21.9272	23.0809		11.7	43.3
			10.72	36.1593		10.72	30.882						10.82	26.677	25.6921	27.7078		10.82	34.306						11.72	22.5231	21.9403	23.0959		11.72	43.5
			10.74	36.2094		10.74	31.033						10.84	26.7052	25.7166	27.742		10.84	33.19						11.74	22.5374	21.9518	23.1118		11.74	42.1
			10.76	36.2606		10.76	28.126						10.86	26.7335	25.7406	27.7753		10.86	31.643						11.76	22.5512	21.9636	23.1286		11.76	42
			10.78	36.3126		10.78	28.776						10.88	26.7621	25.7648	27.8093		10.88	31.662						11.78	22.5654	21.9713	23.1491		11.78	43
			10.8	36.365		10.8	29.536						10.9	26.7897	25.7863	27.8441		10.9	32.619						11.8	22.5787	21.982	23.1623		11.8	41.9
			10.82	36.4187		10.82	27.665						10.92	26.8195	25.8339	27.8617		10.92	33.557						11.82	22.5924	21.9992	23.176		11.82	42.9
			10.84	36.4738		10.84	26.688						10.94	26.8488	25.8723	27.8846		10.94	32.81						11.84	22.606	22.0135	23.1884		11.84	44.3
			10.86	36.5294		10.86	27.389						10.96	26.8791	25.9086	27.9076		10.96	32.975						11.86	22.6199	22.0304	23.2001		11.86	42.1
			10.88	36.5847		10.88	26.894						10.98	26.9086	25.9366	27.9337		10.98	32.991						11.88	22.6343	22.0449	23.2123		11.88	42
			10.9	36.6383		10.9	27.124						11	26.9386	25.9666	27.9581		11	33.486						11.9	22.6483	22.0587	23.2268		11.9	42.9
			10.92	36.6904		10.92	30.028						11.02	26.9688	25.997	27.9888		11.02	33.68						11.92	22.6624	22.0696	23.2441		11.92	41.4
			10.94	36.7426		10.94	29.25						11.04	26.999	26.0199	28.0155		11.04	33.771						11.94	22.6765	22.0853	23.2609		11.94	40.3
			10.96	36.7975		10.96	26.896						11.06	27.0292	26.0441	28.0482		11.06	34.355						11.96	22.691	22.1	23.2816		11.96	42.9
			10.98	36.8537		10.98	25.954						11.08	27.0592	26.0632	28.0856		11.08	35.019						11.98	22.7049	22.111	23.2992		11.98	42.1
			11	36.9102		11	27.221						11.1	27.0889	26.0855	28.1301		11.1	34.375						12	22.7186	22.1226	23.3154		12	44.4
			11.02	36.9661		11.02	26.583						11.12	27.1266	26.139	28.1567		11.12	34.087						12.02	22.733	22.1385	23.3243		12.02	41.5
			11.04	37.0242		11.04	26.716						11.14	27.1642	26.1838	28.1785		11.14	33.918						12.04	22.7466	22.154	23.3344		12.04	42.3
			11.06	37.0839		11.06	24.186						11.16	27.2024	26.2257	28.2093		11.16	33.859						12.06	22.7605	22.1699	23.3452		12.06	42.8
			11.08	37.1441		11.08	24.568						11.18	27.2392	26.259	28.2415		11.18	32.775						12.08	22.7746	22.1834	23.3604		12.08	42.7
			11.1	37.203		11.1	25.984						11.2	27.2755	26.2877	28.2824		11.2	31.611						12.1	22.7885	22.1949	23.3696		12.1	44.3
			11.12	37.2601		11.12	25.939						11.22	27.3117	26.3139	28.322		11.22	32.204						12.12	22.8021	22.2099	23.3854		12.12	42.2
			11.14	37.3183		11.14	26.943						11.24	27.3488	26.3419	28.3641		11.24	32.981						12.14	22.8159	22.2236	23.3994		12.14	42.8
			11.16	37.3764		11.16	24.509						11.26	27.3853	26.3652	28.4096		11.26	33.816						12.16	22.8296	22.2357	23.4157		12.16	42.6
			11.18	37.4347		11.18	25.934						11.28	27.4221	26.3862	28.4571		11.28	33.444						12.18	22.8435	22.2476	23.4313		12.18	42.7
			11.2	37.4906		11.2	26.832						11.3	27.4581	26.4093	28.5158		11.3	33.851						12.2	22.8568	22.2565	23.4498		12.2	43.4
			11.22	37.5456		11.22	27.831						11.32	27.4961	26.459	28.54		11.32	33.69						12.22	22.8707	22.2723	23.4613		12.22	42.9
			11.24	37.5992		11.24	27.223						11.34	27.5342	26.5058	28.5645		11.34	34.33						12.24	22.8842	22.2892	23.4707		12.24	41.9
			11.26	37.6528		11.26	28.858						11.36	27.5722	26.5499	28.5975		11.36	34.687						12.26	22.898	22.3045	23.4814		12.26	42.4
			11.28	37.706		11.28	28.014						11.38	27.6101	26.5935	28.6322		11.38	33.882						12.28	22.9114	22.3193	23.4945		12.28	42.7
			11.3	37.7604		11.3	27.678						11.4	27.6487	26.6316	28.6631		11.4	34.633						12.3	22.9254	22.3331	23.51		12.3	42.4
			11.32	37.8153		11.32	27.17						11.42	27.6869	26.6652	28.7037		11.42	34.434						12.32	22.9394	22.3479	23.5249		12.32	41.8
			11.34	37.87		11.34	27.063						11.44	27.7251	26.6923	28.7389		11.44	33.501						12.34	22.9535	22.3603	23.541		12.34	41.4
			11.36	37.9247		11.36	28.169						11.46	27.7638	26.7188	28.7906		11.46	33.614						12.36	22.9679	22.3752	23.5566		12.36	43.4
			11.38	37.9785		11.38	27.027						11.48	27.8013	26.7449	28.8395		11.48	33.429						12.38	22.9816	22.3865	23.574		12.38	42.6
			11.4	38.033		11.4	28.587						11.5	27.8401	26.7705	28.8927		11.5	34.003						12.4	22.9957	22.4007	23.5926		12.4	41.8
			11.42	38.0869		11.42	26.879						11.52	27.8778	26.8194	28.9239		11.52	32.695						12.42	23.0099	22.4177	23.6045		12.42	42.3
			11.44	38.1404		11.44	28.124						11.54	27.9159	26.869	28.9527		11.54	33.45						12.44	23.0243	22.434	23.6174		12.44	43
			11.46	38.1916		11.46	29.103						11.56	27.9537	26.9153	28.9823		11.56	33.67						12.46	23.0384	22.4512	23.6284		12.46	43.4
			11.48	38.2406		11.48	30.839						11.58	27.9916	26.9603	29.0132		11.58	34.434						12.48	23.0522	22.4652	23.6404		12.48	44.1
			11.5	38.2877		11.5	31.855						11.6	28.0287	26.9914	29.0452		11.6	34.859						12.5	23.0667	22.4789	23.6549		12.5	47.1
			11.52	38.3341		11.52	33.024						11.62	28.067	27.026	29.0846		11.62	34.189						12.52	23.081	22.4943	23.6689		12.52	44.5
			11.54	38.3799		11.54	32.178						11.64	28.1048	27.0558	29.123		11.64	33.928						12.54	23.0954	22.5054	23.686		12.54	42
			11.56	38.4259		11.56	33.075						11.66	28.1424	27.0847	29.1657		11.66	34.253						12.56	23.1092	22.5156	23.7048		12.56	44.4
			11.58	38.4717		11.58	32.608						11.68	28.1802	27.1067	29.2132		11.68	34.642						12.58	23.1235	22.5283	23.7212		12.58	45
			11.6	38.5176		11.6	32.689						11.7	28.2168	27.127	29.2696		11.7	34.573						12.6	23.1373	22.5382	23.7433		12.6	43.3
			11.62	38.5645		11.62	32.688						11.72	28.2547	27.1828	29.2937		11.72	34.432						12.62	23.1518	22.5554	23.7507		12.62	42.5
			11.64	38.6121		11.64	30.714						11.74	28.2916	27.2331	29.3189		11.74	34.229						12.64	23.1665	22.5753	23.7615		12.64	41.8
			11.66	38.662		11.66	31.185						11.76	28.3291	27.2769	29.3474		11.76	34.142						12.66	23.181	22.5898	23.7736		12.66	42
			11.68	38.7124		11.68	28.305						11.78	28.3663	27.3226	29.3787		11.78	34.381						12.68	23.1954	22.6033	23.7876		12.68	43.4
			11.7	38.7626		11.7	29.799						11.8	28.4031	27.3649	29.4082		11.8	34.074						12.7	23.2099	22.6137	23.8018		12.7	42.9
			11.72	38.8112		11.72	31.708						11.82	28.4403	27.4005	29.4504		11.82	33.65						12.72	23.2243	22.6273	23.8147		12.72	43.2
			11.74	38.8591		11.74	31.019						11.84	28.4781	27.4334	29.4912		11.84	34.234						12.74	23.2387	22.6382	23.8288		12.74	41.9
			11.76	38.9068		11.76	31.247						11.86	28.5155	27.4612	29.5333		11.86	34.435						12.76	23.2531	22.6504	23.8427		12.76	42.9
			11.78	38.9538		11.78	32.252						11.88	28.5532	27.4888	29.5694		11.88	34.203						12.78	23.2676	22.6607	23.8616		12.78	41.3
			11.8	39		11.8	32.176						11.9	28.591	27.5144	29.6152		11.9	34.482						12.8	23.2822	22.6692	23.8823		12.8	42.8
			11.82	39.0364		11.82	33.11						11.92	28.6272	27.5655	29.6353		11.92	34.37						12.82	23.2957	22.6859	23.8948		12.82	41.4
			11.84	39.0736		11.84	32.455						11.94	28.6654	27.6189	29.6567		11.94	34.464						12.84	23.3095	22.7072	23.9037		12.84	39.3
			11.86	39.1119		11.86	31.54						11.96	28.7019	27.6624	29.6807		11.96	34.715						12.86	23.3233	22.7219	23.9147		12.86	40.6
			11.88	39.1513		11.88	30.372						11.98	28.7399	27.7016	29.7135		11.98	34.283						12.88	23.3372	22.738	23.93		12.88	41.6
			11.9	39.1905		11.9	30.022						12	28.7773	27.7394	29.7426		12	34.02						12.9	23.3511	22.7563	23.9434		12.9	39.5
			11.92	39.2291		11.92	31.888						12.02	28.8144	27.7756	29.7829		12.02	34.45						12.92	23.3652	22.7702	23.9609		12.92	40.1
			11.94	39.2671		11.94	31.575						12.04	28.8514	27.811	29.8172		12.04	34.731						12.94	23.3793	22.7817	23.9775		12.94	40.2
			11.96	39.3046		11.96	31.865						12.06	28.889	27.8396	29.859		12.06	34.744						12.96	23.393	22.7946	23.9934		12.96	39
			11.98	39.3416		11.98	32.891						12.08	28.9261	27.8691	29.9045		12.08	34.77						12.98	23.4069	22.8058	24.0111		12.98	40.2
			12	39.3783		12	32.874						12.1	28.9637	27.8906	29.9516		12.1	34.683						13	23.4206	22.8128	24.031		13	40
			12.02	39.4159		12.02	32.713						12.12	28.9924	27.9283	29.9714		12.12	34.49						13.02	23.4346	22.8348	24.0419		13.02	39.8
			12.04	39.4539		12.04	30.691						12.14	29.0221	27.9628	29.9899		12.14	34.384						13.04	23.449	22.8514	24.0554		13.04	41.1
			12.06	39.492		12.06	31.645						12.16	29.0523	28.0013	30.0152		12.16	34.727						13.06	23.4637	22.8678	24.068		13.06	39.9
			12.08	39.5291		12.08	32.546						12.18	29.082	28.0341	30.0392		12.18	34.534						13.08	23.4776	22.8802	24.0806		13.08	38.9
			12.1	39.5664		12.1	33.479						12.2	29.1124	28.0682	30.067		12.2	34.629						13.1	23.4919	22.8942	24.0952		13.1	40
			12.12	39.6041		12.12	30.912						12.22	29.1418	28.0973	30.0969		12.22	35.115						13.12	23.5061	22.9051	24.1102		13.12	39.7
			12.14	39.642		12.14	31.298						12.24	29.1712	28.1217	30.134		12.24	34.891						13.14	23.5206	22.9169	24.1271		13.14	40.4
			12.16	39.6793		12.16	33.261						12.26	29.2009	28.1472	30.174		12.26	35.492						13.16	23.5353	22.9273	24.1436		13.16	41
			12.18	39.7166		12.18	32.306						12.28	29.2301	28.1754	30.2122		12.28	34.437						13.18	23.5496	22.9371	24.1625		13.18	42.3
			12.2	39.7555		12.2	31.386						12.3	29.2588	28.1894	30.2586		12.3	33.795						13.2	23.5641	22.9493	24.1787		13.2	42.5
			12.22	39.7952		12.22	29.337						12.32	29.2888	28.2338	30.2829		12.32	33.681						13.22	23.5774	22.9626	24.1925		13.22	40.5
			12.24	39.8351		12.24	30.429						12.34	29.3182	28.2677	30.3169		12.34	34.759						13.24	23.5909	22.9798	24.2063		13.24	41.9
			12.26	39.8746		12.26	30.808						12.36	29.3478	28.306	30.3444		12.36	34.067						13.26	23.6046	22.9927	24.2184		13.26	40.4
			12.28	39.9149		12.28	30.327						12.38	29.3782	28.3365	30.3717		12.38	34.998						13.28	23.6185	23.0041	24.2308		13.28	42
			12.3	39.9559		12.3	28.611						12.4	29.4079	28.3656	30.4018		12.4	35.407						13.3	23.6321	23.0168	24.2457		13.3	43.6
			12.32	39.9981		12.32	29.219						12.42	29.4378	28.3875	30.4363		12.42	35.764						13.32	23.646	23.0274	24.2593		13.32	42.2
			12.34	40.0403		12.34	27.752						12.44	29.4678	28.4186	30.4702		12.44	34.832						13.34	23.6601	23.0379	24.2767		13.34	40.9
			12.36	40.0825		12.36	28.722						12.46	29.4979	28.4434	30.5159		12.46	34.432						13.36	23.6735	23.0502	24.2935		13.36	40.5
			12.38	40.1241		12.38	29.248						12.48	29.5285	28.464	30.5555		12.48	34.645						13.38	23.6873	23.0603	24.3079		13.38	42.4
			12.4	40.1654		12.4	28.968						12.5	29.5581	28.4825	30.5988		12.5	34.723						13.4	23.701	23.0696	24.3236		13.4	41.9
			12.42	40.2061		12.42	29.36						12.52	29.5871	28.5256	30.6191		12.52	34.5						13.42	23.7147	23.0862	24.3381		13.42	41.7
			12.44	40.2471		12.44	30.389						12.54	29.6166	28.5637	30.6447		12.54	33.643						13.44	23.7285	23.1016	24.3508		13.44	38.7
			12.46	40.2877		12.46	28.493						12.56	29.6462	28.5972	30.6692		12.56	33.791						13.46	23.742	23.1153	24.3641		13.46	40.1
			12.48	40.3285		12.48	30.194						12.58	29.6761	28.6312	30.7029		12.58	34.067						13.48	23.7554	23.129	24.3778		13.48	41
			12.5	40.3675		12.5	30.01						12.6	29.7058	28.6624	30.7351		12.6	34.95						13.5	23.7691	23.1404	24.3902		13.5	40.9
			12.52	40.4062		12.52	32.323						12.62	29.7349	28.6897	30.7652		12.62	34.095						13.52	23.7826	23.1543	24.4058		13.52	40.8
			12.54	40.4434		12.54	31.226						12.64	29.7639	28.7173	30.8007		12.64	34.319						13.54	23.7962	23.1663	24.4193		13.54	41.9
			12.56	40.4814		12.56	33.533						12.66	29.793	28.7429	30.8389		12.66	34.334						13.56	23.8096	23.179	24.4378		13.56	40.1
			12.58	40.5188		12.58	30.545						12.68	29.8213	28.7645	30.8791		12.68	35.118						13.58	23.8232	23.1889	24.4542		13.58	40.8
			12.6	40.5573		12.6	32.488						12.7	29.8507	28.7889	30.9135		12.7	37.026						13.6	23.8367	23.2005	24.4765		13.6	39.4
			12.62	40.5963		12.62	30.941						12.72	29.8789	28.8285	30.9354		12.72	36.869						13.62	23.851	23.22	24.4887		13.62	40.7
			12.64	40.6366		12.64	29.111						12.74	29.9078	28.8676	30.9688		12.74	36.766						13.64	23.865	23.2355	24.4967		13.64	39.6
			12.66	40.6767		12.66	29.713						12.76	29.9359	28.9	30.9884		12.76	37.143						13.66	23.8788	23.2522	24.5084		13.66	40.2
			12.68	40.7169		12.68	31.457						12.78	29.9652	28.9336	31.0205		12.78	36.799						13.68	23.8929	23.2675	24.5222		13.68	40.9
			12.7	40.757		12.7	28.723						12.8	29.9933	28.9619	31.0484		12.8	36.749						13.7	23.9068	23.2844	24.5337		13.7	41
			12.72	40.7972		12.72	29.968						12.82	30.0228	28.9926	31.0808		12.82	35.697						13.72	23.9209	23.2979	24.5483		13.72	40.4
			12.74	40.838		12.74	31.312						12.84	30.0508	29.0097	31.1138		12.84	33.308						13.74	23.9351	23.3075	24.5618		13.74	39.5
			12.76	40.8793		12.76	27.249						12.86	30.0804	29.0422	31.1549		12.86	33.774						13.76	23.9493	23.3191	24.5779		13.76	41.7
			12.78	40.9216		12.78	28.984						12.88	30.1088	29.0625	31.1839		12.88	33.669						13.78	23.9624	23.3324	24.5935		13.78	41.3
			12.8	40.9635		12.8	29.221						12.9	30.1372	29.0867	31.2208		12.9	33.641						13.8	23.9761	23.3413	24.6097		13.8	40.4
			12.82	41.004		12.82	28.126						12.92	30.1664	29.1278	31.2492		12.92	32.957						13.82	23.9896	23.358	24.6204		13.82	41.1
			12.84	41.0429		12.84	31.841						12.94	30.1957	29.1724	31.2661		12.94	33.039						13.84	24.0031	23.3749	24.6339		13.84	40.4
			12.86	41.0812		12.86	33.126						12.96	30.2252	29.2131	31.2873		12.96	33.745						13.86	24.0165	23.3907	24.6479		13.86	40.2
			12.88	41.1204		12.88	29.479						12.98	30.2547	29.2462	31.3131		12.98	33.808						13.88	24.0301	23.4064	24.6594		13.88	42
			12.9	41.162		12.9	29.496						13	30.2846	29.2831	31.3423		13	33.478						13.9	24.0436	23.4173	24.6731		13.9	41.2
			12.92	41.2037		12.92	27.954						13.02	30.3143	29.3144	31.3696		13.02	34.366						13.92	24.0569	23.4281	24.6872		13.92	40
			12.94	41.2459		12.94	29.241						13.04	30.344	29.342	31.3999		13.04	34.264						13.94	24.0703	23.4402	24.7028		13.94	40.2
			12.96	41.2882		12.96	28.498						13.06	30.3737	29.3707	31.4338		13.06	34.825						13.96	24.0839	23.4522	24.7164		13.96	40.1
			12.98	41.3301		12.98	27.809						13.08	30.4032	29.3918	31.4733		13.08	34.875						13.98	24.0974	23.4613	24.7339		13.98	40
			13	41.3715		13	29.927						13.1	30.4321	29.4156	31.5085		13.1	33.844						14	24.1111	23.4749	24.749		14	41
			13.02	41.4111		13.02	29.592						13.12	30.4669	29.4548	31.5361		13.12	33.794						14.02	24.125	23.4926	24.7627		14.02	39.8
			13.04	41.4512		13.04	31.837						13.14	30.502	29.4943	31.5673		13.14	32.469						14.04	24.1387	23.5079	24.7738		14.04	41.5
			13.06	41.492		13.06	28.62						13.16	30.5363	29.5347	31.6033		13.16	32.996						14.06	24.1527	23.5221	24.7868		14.06	42.6
			13.08	41.5337		13.08	28.242						13.18	30.5708	29.5608	31.6359		13.18	33.168						14.08	24.1667	23.5361	24.7994		14.08	43.2
			13.1	41.5748		13.1	29.918						13.2	30.6048	29.5894	31.6699		13.2	33.165						14.1	24.1804	23.5499	24.8144		14.1	44.2
			13.12	41.6153		13.12	29.828						13.22	30.6391	29.6171	31.7149		13.22	32.604						14.12	24.1944	23.5634	24.828		14.12	43.9
			13.14	41.6548		13.14	29.424						13.24	30.6741	29.6432	31.7634		13.24	32.864						14.14	24.2084	23.5768	24.8444		14.14	42.7
			13.16	41.6946		13.16	32.313						13.26	30.7087	29.6635	31.8154		13.26	31.949						14.16	24.2227	23.5878	24.8578		14.16	43.1
			13.18	41.7356		13.18	29.112						13.28	30.7427	29.6851	31.8662		13.28	31.697						14.18	24.236	23.5974	24.8772		14.18	43.2
			13.2	41.7796		13.2	26.81						13.3	30.7772	29.7084	31.9235		13.3	31.689						14.2	24.2495	23.6079	24.8929		14.2	45
			13.22	41.8236		13.22	26.113						13.32	30.8118	29.7521	31.9558		13.32	31.644						14.22	24.2638	23.6226	24.9045		14.22	42.2
			13.24	41.8668		13.24	29.329						13.34	30.8459	29.7936	31.9856		13.34	31.589						14.24	24.2779	23.6372	24.9167		14.24	41.4
			13.26	41.91		13.26	28.198						13.36	30.8809	29.8329	32.0157		13.36	31.659						14.26	24.2919	23.656	24.9321		14.26	43.3
			13.28	41.9536		13.28	26.316						13.38	30.9159	29.8696	32.0496		13.38	32.412						14.28	24.3057	23.6699	24.9457		14.28	45.5
			13.3	41.9985		13.3	28.329						13.4	30.9505	29.9071	32.0864		13.4	33.059						14.3	24.3202	23.684	24.9587		14.3	43.1
			13.32	42.0442		13.32	25.849						13.42	30.9854	29.9317	32.1187		13.42	32.462						14.32	24.3346	23.6959	24.9763		14.32	41
			13.34	42.0907		13.34	24.992						13.44	31.0187	29.9614	32.1572		13.44	31.949						14.34	24.3494	23.7077	24.995		14.34	41.9
			13.36	42.134		13.36	26.905						13.46	31.0532	29.9845	32.2004		13.46	31.994						14.36	24.3633	23.7186	25.0126		14.36	42.3
			13.38	42.1742		13.38	31.622						13.48	31.088	30.0111	32.2441		13.48	32.25						14.38	24.3777	23.7318	25.0304		14.38	42.7
			13.4	42.2122		13.4	31.454						13.5	31.1224	30.0285	32.2964		13.5	31.753						14.4	24.3922	23.7422	25.0509		14.4	42.5
			13.42	42.2506		13.42	32.021						13.52	31.1572	30.0765	32.316		13.52	32.111						14.42	24.4065	23.7571	25.065		14.42	41.9
			13.44	42.2893		13.44	30.588						13.54	31.1915	30.1073	32.3442		13.54	31.992						14.44	24.4209	23.7712	25.0796		14.44	40
			13.46	42.3277		13.46	30.985						13.56	31.225	30.1425	32.376		13.56	32.009						14.46	24.4356	23.7846	25.0932		14.46	42
			13.48	42.3653		13.48	32.592						13.58	31.2585	30.1699	32.4113		13.58	32.753						14.48	24.4497	23.7989	25.1063		14.48	41.3
			13.5	42.402		13.5	32.532						13.6	31.2916	30.1992	32.447		13.6	32.999						14.5	24.4642	23.8129	25.1228		14.5	41.6
			13.52	42.4386		13.52	33.237						13.62	31.3256	30.2295	32.4831		13.62	31.384						14.52	24.4787	23.8273	25.139		14.52	39.8
			13.54	42.4756		13.54	32.995						13.64	31.3589	30.2571	32.5228		13.64	31.42						14.54	24.4924	23.8344	25.1578		14.54	40.7
			13.56	42.5136		13.56	31.599						13.66	31.3925	30.2762	32.5684		13.66	31.732						14.56	24.5067	23.8503	25.1716		14.56	41.6
			13.58	42.5528		13.58	30.516						13.68	31.4263	30.2942	32.6191		13.68	31.983						14.58	24.5204	23.8599	25.1938		14.58	41.7
			13.6	42.5925		13.6	30.056						13.7	31.4596	30.3135	32.6674		13.7	31.95						14.6	24.5342	23.8691	25.2107		14.6	43.7
			13.62	42.6317		13.62	30.611						13.72	31.4949	30.3543	32.6943		13.72	31.453						14.62	24.5486	23.8879	25.2223		14.62	39.8
			13.64	42.6701		13.64	31.636						13.74	31.5298	30.3957	32.7265		13.74	31.194						14.64	24.563	23.9052	25.2311		14.64	37.8
			13.66	42.708		13.66	31.891						13.76	31.565	30.4419	32.7589		13.76	31.976						14.66	24.577	23.9222	25.2404		14.66	37.9
			13.68	42.7451		13.68	31.792						13.78	31.6002	30.4757	32.7901		13.78	31.485						14.68	24.5911	23.9379	25.2537		14.68	39.8
			13.7	42.7818		13.7	33.707						13.8	31.6349	30.5108	32.8244		13.8	30.9						14.7	24.6054	23.9536	25.2676		14.7	38.4
			13.72	42.8172		13.72	33.11						13.82	31.6701	30.5454	32.8688		13.82	31.828						14.72	24.62	23.9682	25.2847		14.72	41.6
			13.74	42.852		13.74	35.381						13.84	31.7038	30.5739	32.9031		13.84	31.334						14.74	24.6341	23.9811	25.3004		14.74	41
			13.76	42.8861		13.76	35.422						13.86	31.7394	30.6092	32.9392		13.86	31.715						14.76	24.648	23.9905	25.3176		14.76	39.5
			13.78	42.9232		13.78	34.985						13.88	31.7737	30.631	32.9895		13.88	31.494						14.78	24.6622	24.0024	25.3302		14.78	38.4
			13.8	42.9631		13.8	27.218						13.9	31.8085	30.6552	33.04		13.9	31.422						14.8	24.6763	24.0125	25.3514		14.8	39.8
			13.82	43.0066		13.82	28.383						13.92	31.8431	30.712	33.066		13.92	31.88						14.82	24.6903	24.0323	25.3615		14.82	40.8
			13.84	43.0497		13.84	27.434						13.94	31.878	30.7552	33.0935		13.94	31.486						14.84	24.7044	24.047	25.3736		14.84	42.7
			13.86	43.0921		13.86	28.138						13.96	31.9125	30.7993	33.1207		13.96	31.925						14.86	24.7188	24.0607	25.3868		14.86	42.2
			13.88	43.1341		13.88	29.697						13.98	31.9471	30.8377	33.1558		13.98	31.709						14.88	24.7332	24.0765	25.4006		14.88	39
			13.9	43.1773		13.9	28.368						14	31.9808	30.8768	33.1924		14	31.38						14.9	24.747	24.0891	25.4114		14.9	41.2
			13.92	43.2221		13.92	25.574																		14.92	24.7611	24.1034	25.4293		14.92	40
			13.94	43.2664		13.94	26.685																		14.94	24.7758	24.1172	25.4448		14.94	38.4
			13.96	43.3092		13.96	29.393																		14.96	24.7897	24.1275	25.4635		14.96	40.9
			13.98	43.3505		13.98	28.51																		14.98	24.8041	24.1377	25.4841		14.98	39.9
			14	43.3917		14	29.484																		15	24.8184	24.1495	25.5032		15	37.8
			14.02	43.4326		14.02	29.916																		15.02	24.8328	24.1688	25.5142		15.02	39.5
			14.04	43.473		14.04	28.837																		15.04	24.8471	24.1864	25.5255		15.04	38
			14.06	43.5131		14.06	30.707																		15.06	24.8612	24.2027	25.5377		15.06	37.9
			14.08	43.5537		14.08	30.8																		15.08	24.8756	24.2179	25.551		15.08	38.9
			14.1	43.5967		14.1	27.409																		15.1	24.8898	24.2311	25.5677		15.1	37.7
			14.12	43.6425		14.12	25.854																		15.12	24.9037	24.2437	25.5821		15.12	38.2
			14.14	43.6879		14.14	25.751																		15.14	24.9182	24.2578	25.6011		15.14	37.3
			14.16	43.7314		14.16	27.996																		15.16	24.9322	24.2681	25.6175		15.16	39.1
			14.18	43.7715		14.18	29.454																		15.18	24.9465	24.2808	25.634		15.18	37.1
			14.2	43.8094		14.2	32.654																		15.2	24.9609	24.2932	25.6557		15.2	39.2
			14.22	43.8458		14.22	33.295																		15.22	24.9748	24.3065	25.6681		15.22	38.7
			14.24	43.882		14.24	33.535																		15.24	24.9884	24.3216	25.6821		15.24	38.3
			14.26	43.9185		14.26	33.005																		15.26	25.002	24.3358	25.6933		15.26	38.3
			14.28	43.9543		14.28	32.515																		15.28	25.0157	24.3475	25.7047		15.28	40.9
			14.3	43.9896		14.3	35.48																		15.3	25.029	24.3626	25.7225		15.3	40.3
			14.32	44.0248		14.32	34.355																		15.32	25.0422	24.3765	25.7385		15.32	38.2
			14.34	44.061		14.34	32.96																		15.34	25.0556	24.3872	25.7546		15.34	38.1
			14.36	44.0976		14.36	32.496																		15.36	25.069	24.3961	25.7754		15.36	39.2
			14.38	44.1352		14.38	33.208																		15.38	25.0821	24.4073	25.7947		15.38	38.7
			14.4	44.1736		14.4	30.651																		15.4	25.0956	24.4203	25.8141		15.4	38.4
			14.42	44.2125		14.42	30.214																		15.42	25.1096	24.432	25.8286		15.42	38.8
			14.44	44.2504		14.44	31.989																		15.44	25.1241	24.4464	25.84		15.44	38
			14.46	44.2876		14.46	33.27																		15.46	25.1386	24.4642	25.8533		15.46	38.2
			14.48	44.3247		14.48	31.932																		15.48	25.153	24.4763	25.869		15.48	38.1
			14.5	44.3621		14.5	32.391																		15.5	25.1672	24.4896	25.8863		15.5	38.3
			14.52	44.3981		14.52	32.344																		15.52	25.1817	24.5019	25.9012		15.52	36.4
			14.54	44.433		14.54	35.449																		15.54	25.196	24.512	25.9211		15.54	36.7
			14.56	44.4681		14.56	36.004																		15.56	25.2101	24.5217	25.9361		15.56	37.7
			14.58	44.5047		14.58	31.374																		15.58	25.2246	24.5312	25.9576		15.58	37.9
			14.6	44.5431		14.6	31.576																		15.6	25.2385	24.5405	25.9772		15.6	38.1
			14.62	44.5823		14.62	31.219																		15.62	25.2528	24.5574	25.9904		15.62	37.8
			14.64	44.6228		14.64	29.475																		15.64	25.267	24.5765	26.0059		15.64	37.8
			14.66	44.6653		14.66	28.45																		15.66	25.281	24.5897	26.0215		15.66	38.3
			14.68	44.7065		14.68	27.23																		15.68	25.2955	24.6061	26.034		15.68	37.2
			14.7	44.7481		14.7	32.047																		15.7	25.3096	24.6182	26.0518		15.7	38.7
			14.72	44.7888		14.72	27.608																		15.72	25.3235	24.6289	26.0629		15.72	39.2
			14.74	44.8313		14.74	29.301																		15.74	25.3378	24.6389	26.0775		15.74	37.6
			14.76	44.8729		14.76	28.124																		15.76	25.352	24.6503	26.095		15.76	36.2
			14.78	44.915		14.78	29.425																		15.78	25.3663	24.6597	26.1107		15.78	39.1
			14.8	44.9565		14.8	28.412																		15.8	25.3802	24.6706	26.1344		15.8	38.1
			14.82	44.998		14.82	29.186																		15.82	25.3943	24.6868	26.1477		15.82	38.2
			14.84	45.0376		14.84	29.537																		15.84	25.4078	24.704	26.1601		15.84	37.4
			14.86	45.0762		14.86	32.513																		15.86	25.4215	24.7186	26.1709		15.86	37.3
			14.88	45.1137		14.88	31.701																		15.88	25.4356	24.7337	26.1838		15.88	37.3
			14.9	45.1535		14.9	32.168																		15.9	25.4495	24.7455	26.1985		15.9	36.4
			14.92	45.1952		14.92	27.101																		15.92	25.463	24.7559	26.2144		15.92	38.1
			14.94	45.239		14.94	27.357																		15.94	25.4765	24.7689	26.227		15.94	37.4
			14.96	45.2816		14.96	28.046																		15.96	25.49	24.7773	26.245		15.96	36.9
			14.98	45.3228		14.98	29.577																		15.98	25.5031	24.7905	26.2613		15.98	36.7
			15	45.3643		15	30.164																		16	25.5163	24.7986	26.2777		16	37.3
			15.02	45.4072		15.02	27.192																		16.02	25.5303	24.816	26.2862		16.02	38.2
			15.04	45.4529		15.04	27.041																		16.04	25.545	24.832	26.2991		16.04	35.3
			15.06	45.4987		15.06	24.94																		16.06	25.5596	24.8469	26.3101		16.06	36.1
			15.08	45.5454		15.08	26.856																		16.08	25.5741	24.8615	26.3245		16.08	35.6
			15.1	45.5905		15.1	25.622																		16.1	25.5883	24.8755	26.34		16.1	36
			15.12	45.6354		15.12	27.696																		16.12	25.6028	24.8904	26.353		16.12	36
			15.14	45.6785		15.14	27.25																		16.14	25.6169	24.9023	26.3714		16.14	36.5
			15.16	45.7209		15.16	29.001																		16.16	25.6315	24.9156	26.3834		16.16	36.9
			15.18	45.7629		15.18	28.873																		16.18	25.6456	24.9278	26.4025		16.18	37.4
			15.2	45.8053		15.2	28.356																		16.2	25.6603	24.9409	26.4212		16.2	37.7
			15.22	45.8487		15.22	27.953																		16.22	25.6749	24.9569	26.4333		16.22	37.5
			15.24	45.8921		15.24	27.034																		16.24	25.6907	24.9718	26.4452		16.24	37.1
			15.26	45.9349		15.26	28.331																		16.26	25.7061	24.9869	26.4612		16.26	35.9
			15.28	45.9775		15.28	29.118																		16.28	25.7217	25.0003	26.4751		16.28	36.6
			15.3	46.0203		15.3	27.401																		16.3	25.7372	25.0148	26.4894		16.3	37.2
			15.32	46.064		15.32	27.995																		16.32	25.7533	25.0268	26.5068		16.32	36.6
			15.34	46.1083		15.34	27.341																		16.34	25.769	25.0408	26.5256		16.34	36.2
			15.36	46.1531		15.36	26.223																		16.36	25.7842	25.0527	26.5452		16.36	37
			15.38	46.1995		15.38	27.191																		16.38	25.7998	25.0651	26.5664		16.38	36.6
			15.4	46.2461		15.4	24.543																		16.4	25.8156	25.0736	26.5894		16.4	36.5
			15.42	46.2927		15.42	25.799																		16.42	25.8312	25.092	26.6043		16.42	36.2
			15.44	46.3359		15.44	27.222																		16.44	25.8471	25.107	26.6174		16.44	36.9
			15.46	46.3756		15.46	30.773																		16.46	25.8626	25.1238	26.6319		16.46	37.2
			15.48	46.4131		15.48	32.964																		16.48	25.8787	25.1396	26.6468		16.48	37.1
			15.5	46.4491		15.5	32.841																		16.5	25.8948	25.1536	26.6628		16.5	37.3
			15.52	46.4847		15.52	34.517																		16.52	25.9106	25.1703	26.6846		16.52	36.5
			15.54	46.5207		15.54	34.203																		16.54	25.9266	25.1887	26.7041		16.54	35.5
			15.56	46.5583		15.56	31.617																		16.56	25.9426	25.2014	26.7231		16.56	36.1
			15.58	46.5975		15.58	30.541																		16.58	25.9584	25.211	26.7435		16.58	36.5
			15.6	46.638		15.6	30.085																		16.6	25.9741	25.2238	26.7617		16.6	36.6
			15.62	46.679		15.62	28.52																		16.62	25.9898	25.244	26.7748		16.62	36.4
			15.64	46.7198		15.64	29.539																		16.64	26.006	25.265	26.7862		16.64	35.8
			15.66	46.7594		15.66	30.675																		16.66	26.0223	25.2813	26.7994		16.66	36.2
			15.68	46.7987		15.68	30.959																		16.68	26.0382	25.2987	26.8136		16.68	36.1
			15.7	46.8374		15.7	30.532																		16.7	26.0542	25.3161	26.8266		16.7	35.8
			15.72	46.8761		15.72	31.84																		16.72	26.0699	25.3311	26.8456		16.72	37.4
			15.74	46.9137		15.74	31.114																		16.74	26.0857	25.3433	26.862		16.74	36.3
			15.76	46.9513		15.76	33.109																		16.76	26.1022	25.3573	26.883		16.76	35.5
			15.78	46.9884		15.78	31.89																		16.78	26.1179	25.3685	26.9027		16.78	35.4
			15.8	47.0263		15.8	32.472																		16.8	26.134	25.382	26.9265		16.8	35.3
			15.82	47.0641		15.82	31.125																		16.82	26.1501	25.4007	26.9421		16.82	34.3
			15.84	47.1018		15.84	32.104																		16.84	26.166	25.4155	26.9561		16.84	35
			15.86	47.1385		15.86	32.575																		16.86	26.1827	25.4348	26.9745		16.86	34.7
			15.88	47.176		15.88	33.956																		16.88	26.1991	25.4475	26.9942		16.88	35.7
			15.9	47.215		15.9	29.755																		16.9	26.2156	25.4636	27.0126		16.9	35.4
			15.92	47.2569		15.92	28.979																		16.92	26.2317	25.478	27.0323		16.92	35.2
			15.94	47.2986		15.94	27.665																		16.94	26.2479	25.4899	27.0571		16.94	34.8
			15.96	47.3389		15.96	30.058																		16.96	26.2645	25.5029	27.0724		16.96	35.1
			15.98	47.378		15.98	32.006																		16.98	26.2803	25.5162	27.093		16.98	35.5
			16	47.4177		16	30.265																		17	26.2971	25.5292	27.1136		17	34.6
			16.02	47.4586		16.02	28.988																		17.02	26.313	25.5484	27.123		17.02	35.4
			16.04	47.5002		16.04	29.037																		17.04	26.3291	25.5683	27.133		17.04	36.9
			16.06	47.5415		16.06	29.004																		17.06	26.3447	25.5829	27.1495		17.06	36.3
			16.08	47.5812		16.08	29.38																		17.08	26.3609	25.6004	27.1644		17.08	37.5
			16.1	47.6198		16.1	32.64																		17.1	26.3768	25.618	27.1795		17.1	37.2
			16.12	47.6578		16.12	31.838																		17.12	26.3929	25.6334	27.1962		17.12	37.1
			16.14	47.6957		16.14	30.61																		17.14	26.4087	25.6497	27.2159		17.14	36.2
			16.16	47.7327		16.16	32.946																		17.16	26.4244	25.6578	27.2329		17.16	36.7
			16.18	47.7691		16.18	33.996																		17.18	26.4401	25.6727	27.2549		17.18	36.9
			16.2	47.8062		16.2	32.473																		17.2	26.4555	25.6867	27.2742		17.2	36.1
			16.22	47.8449		16.22	30.956																		17.22	26.4722	25.7051	27.2911		17.22	36
			16.24	47.8839		16.24	30.046																		17.24	26.4886	25.7235	27.3054		17.24	36
			16.26	47.9229		16.26	31.615																		17.26	26.5044	25.7363	27.3228		17.26	36.1
			16.28	47.9616		16.28	31.111																		17.28	26.5204	25.7538	27.3398		17.28	34.1
			16.3	48		16.3	30.815																		17.3	26.5372	25.7693	27.3575		17.3	35.9
			16.32	48.0589		16.32	32.156																		17.32	26.5533	25.7828	27.3746		17.32	33.2
			16.34	48.1182		16.34	32.16																		17.34	26.5699	25.7944	27.395		17.34	33.3
			16.36	48.1779		16.36	31.701																		17.36	26.586	25.8076	27.4128		17.36	33.8
			16.38	48.2376		16.38	31.376																		17.38	26.6026	25.8211	27.4355		17.38	33.2
			16.4	48.2979		16.4	32.203																		17.4	26.6197	25.8315	27.4638		17.4	33
			16.42	48.3582		16.42	30.709																		17.42	26.6368	25.8495	27.481		17.42	33.5
			16.44	48.4189		16.44	31.353																		17.44	26.6537	25.8695	27.4964		17.44	32.9
			16.46	48.4794		16.46	31.597																		17.46	26.6711	25.8873	27.5136		17.46	33.9
			16.48	48.5398		16.48	31.067																		17.48	26.6883	25.9037	27.5327		17.48	33.5
			16.5	48.6021		16.5	31.441																		17.5	26.7056	25.919	27.5521		17.5	34.1
			16.52	48.6665		16.52	28.852																		17.52	26.7229	25.9333	27.5759		17.52	34.6
			16.54	48.7347		16.54	28.008																		17.54	26.7401	25.9481	27.595		17.54	34.2
			16.56	48.8041		16.56	26.478																		17.56	26.7575	25.96	27.6159		17.56	33.5
			16.58	48.8732		16.58	27.528																		17.58	26.7747	25.9744	27.6383		17.58	35.3
			16.6	48.9406		16.6	28.177																		17.6	26.7917	25.9866	27.6659		17.6	34.8
			16.62	49.0075		16.62	28.708																		17.62	26.8085	26.0021	27.6807		17.62	34.5
			16.64	49.0735		16.64	28.194																		17.64	26.8249	26.0218	27.6954		17.64	34.7
			16.66	49.1401		16.66	29.134																		17.66	26.8429	26.0367	27.7115		17.66	36.1
			16.68	49.2059		16.68	28.105																		17.68	26.8589	26.0549	27.7291		17.68	35.6
			16.7	49.2725		16.7	29.132																		17.7	26.876	26.0696	27.7426		17.7	36.1
			16.72	49.3384		16.72	28.176																		17.72	26.8928	26.0817	27.765		17.72	36.2
			16.74	49.4043		16.74	29.001																		17.74	26.9104	26.1012	27.785		17.74	34.8
			16.76	49.4703		16.76	29.169																		17.76	26.9269	26.1115	27.8077		17.76	35.5
			16.78	49.5377		16.78	27.917																		17.78	26.9441	26.1263	27.8336		17.78	35.4
			16.8	49.6077		16.8	27.353																		17.8	26.9614	26.1393	27.8546		17.8	36.8
			16.82	49.6801		16.82	25.904																		17.82	26.9785	26.1577	27.8673		17.82	37.2
			16.84	49.753		16.84	25.288																		17.84	26.9954	26.175	27.8864		17.84	36
			16.86	49.8266		16.86	26.871																		17.86	27.0127	26.1888	27.9003		17.86	37.2
			16.88	49.8998		16.88	25.035																		17.88	27.0298	26.2007	27.915		17.88	35.7
			16.9	49.9738		16.9	25.847																		17.9	27.0468	26.2174	27.9373		17.9	35.5
			16.92	50.0466		16.92	25.976																		17.92	27.0641	26.2316	27.9563		17.92	34.5
			16.94	50.1172		16.94	26.221																		17.94	27.0811	26.2478	27.9758		17.94	33.9
			16.96	50.1856		16.96	28.421																		17.96	27.0985	26.2601	27.9928		17.96	35.6
			16.98	50.252		16.98	28.47																		17.98	27.1161	26.2719	28.0164		17.98	35.9
			17	50.3189		17	28.801																		18	27.1336	26.2846	28.0378		18	36
			17.02	50.3863		17.02	27.688																		18.02	27.1498	26.307	28.0532		18.02	35.4
			17.04	50.4554		17.04	27.883																		18.04	27.1669	26.3242	28.0734		18.04	35.6
			17.06	50.5258		17.06	26.713																		18.06	27.1846	26.3456	28.0956		18.06	35.6
			17.08	50.5972		17.08	26.12																		18.08	27.2019	26.3653	28.1106		18.08	36.1
			17.1	50.6715		17.1	26.822																		18.1	27.2194	26.3788	28.1325		18.1	36.4
			17.12	50.7473		17.12	23.592																		18.12	27.2366	26.3946	28.1477		18.12	37.1
			17.14	50.8247		17.14	24.609																		18.14	27.2535	26.406	28.1694		18.14	36
			17.16	50.8989		17.16	25.345																		18.16	27.2712	26.4209	28.1885		18.16	37.8
			17.18	50.9726		17.18	26.661																		18.18	27.2885	26.4337	28.2129		18.18	35.7
			17.2	51.0483		17.2	25.164																		18.2	27.3059	26.4474	28.2347		18.2	37.1
			17.22	51.1256		17.22	23.225																		18.22	27.3262	26.4698	28.2531		18.22	36.4
			17.24	51.2004		17.24	25.249																		18.24	27.3466	26.4873	28.2731		18.24	36.1
			17.26	51.2719		17.26	27.563																		18.26	27.3672	26.5058	28.291		18.26	36.9
			17.28	51.3415		17.28	26.684																		18.28	27.3878	26.5231	28.3191		18.28	38.9
			17.3	51.4109		17.3	27.407																		18.3	27.408	26.5407	28.3392		18.3	37.8
			17.32	51.4794		17.32	27.867																		18.32	27.4288	26.5548	28.3627		18.32	37.1
			17.34	51.5487		17.34	27.706																		18.34	27.449	26.5692	28.3865		18.34	36.4
			17.36	51.6191		17.36	26.543																		18.36	27.4697	26.5818	28.4129		18.36	36.9
			17.38	51.6931		17.38	26.546																		18.38	27.4898	26.5954	28.4415		18.38	36.5
			17.4	51.7693		17.4	23.758																		18.4	27.5092	26.611	28.4731		18.4	37.4
			17.42	51.8473		17.42	24.339																		18.42	27.5294	26.6308	28.4929		18.42	37.4
			17.44	51.924		17.44	24.737																		18.44	27.55	26.6499	28.5088		18.44	37.2
			17.46	52.0014		17.46	25.079																		18.46	27.5707	26.672	28.529		18.46	38.1
			17.48	52.0795		17.48	23.722																		18.48	27.5906	26.69	28.5513		18.48	36.4
			17.5	52.1601		17.5	23.964																		18.5	27.6114	26.7034	28.5725		18.5	37.9
			17.52	52.2403		17.52	22.836																		18.52	27.6315	26.7239	28.5919		18.52	36.9
			17.54	52.3208		17.54	24.18																		18.54	27.6524	26.7436	28.6156		18.54	35.9
			17.56	52.399		17.56	23.598																		18.56	27.673	26.7591	28.6414		18.56	38.3
			17.58	52.4759		17.58	24.959																		18.58	27.6929	26.7725	28.6673		18.58	38.1
			17.6	52.5519		17.6	25.392																		18.6	27.7125	26.7871	28.6918		18.6	38.8
			17.62	52.6275		17.62	24.492																		18.62	27.732	26.8093	28.7088		18.62	37.4
			17.64	52.7025		17.64	25.255																		18.64	27.7515	26.8303	28.7291		18.64	37.8
			17.66	52.7764		17.66	26.132																		18.66	27.7717	26.8476	28.7475		18.66	38
			17.68	52.851		17.68	25.538																		18.68	27.7913	26.8662	28.7634		18.68	37.3
			17.7	52.9287		17.7	24.521																		18.7	27.8107	26.8831	28.7836		18.7	36.6
			17.72	53.0098		17.72	23.191																		18.72	27.831	26.9045	28.8049		18.72	36.8
			17.74	53.0914		17.74	22.393																		18.74	27.8506	26.9184	28.8294		18.74	36.8
			17.76	53.1714		17.76	24.116																		18.76	27.8703	26.9338	28.8581		18.76	36.7
			17.78	53.2501		17.78	24.563																		18.78	27.8906	26.9504	28.8916		18.78	36.9
			17.8	53.33		17.8	23.536																		18.8	27.9102	26.9646	28.9126		18.8	36.8
			17.82	53.41		17.82	23.118																		18.82	27.9306	26.9848	28.9351		18.82	36.4
			17.84	53.4888		17.84	24.416																		18.84	27.9496	27	28.9526		18.84	36.1
			17.86	53.5656		17.86	24.66																		18.86	27.9692	27.0171	28.9676		18.86	36.5
			17.88	53.6417		17.88	24.959																		18.88	27.9888	27.0392	28.9893		18.88	36.6
			17.9	53.7167		17.9	25.069																		18.9	28.0085	27.0547	29.0094		18.9	36.5
			17.92	53.791		17.92	25.758																		18.92	28.0283	27.0702	29.0298		18.92	36.3
			17.94	53.8642		17.94	25.774																		18.94	28.0481	27.0864	29.0529		18.94	36.4
			17.96	53.9379		17.96	26.143																		18.96	28.0667	27.1022	29.0762		18.96	36.9
			17.98	54.0123		17.98	25.218																		18.98	28.0854	27.1113	29.1052		18.98	36.7
			18	54.0883		18	25.084																		19	28.104	27.1289	29.1318		19	35.8
			18.02	54.1649		18.02	24.532
			18.04	54.2443		18.04	24.595
			18.06	54.3233		18.06	22.523
			18.08	54.4013		18.08	24.811
			18.1	54.4743		18.1	25.638
			18.12	54.544		18.12	27.444
			18.14	54.6119		18.14	28.534
			18.16	54.6782		18.16	27.666
			18.18	54.7425		18.18	29.655
			18.2	54.8037		18.2	31.096
			18.22	54.863		18.22	32.134
			18.24	54.921		18.24	32.637
			18.26	54.978		18.26	33.31
			18.28	55.0379		18.28	33.909
			18.3	55.1026		18.3	27.643
			18.32	55.1731		18.32	26.379
			18.34	55.2443		18.34	26.643
			18.36	55.3157		18.36	26.806
			18.38	55.3878		18.38	26.181
			18.4	55.4608		18.4	25.948
			18.42	55.5321		18.42	25.708
			18.44	55.6013		18.44	28.095
			18.46	55.6685		18.46	28.402
			18.48	55.7348		18.48	28.126
			18.5	55.8016		18.5	29.291
			18.52	55.8688		18.52	27.676
			18.54	55.936		18.54	27.63
			18.56	56.0017		18.56	29.291
			18.58	56.0693		18.58	29.697
			18.6	56.1409		18.6	25.09
			18.62	56.2156		18.62	24.651
			18.64	56.2901		18.64	26.417
			18.66	56.3637		18.66	25.228
			18.68	56.4392		18.68	25.671
			18.7	56.5142		18.7	24.433
			18.72	56.5892		18.72	25.715
			18.74	56.6615		18.74	25.646
			18.76	56.7326		18.76	27.301
			18.78	56.8013		18.78	26.979
			18.8	56.8683		18.8	28.518
			18.82	56.9339		18.82	29.351
			18.84	56.9996		18.84	28.86
			18.86	57.0648		18.86	28.384
			18.88	57.1291		18.88	29.987
			18.9	57.1938		18.9	30.021
			18.92	57.2595		18.92	27.894
			18.94	57.3261		18.94	28.569
			18.96	57.3911		18.96	28.932
			18.98	57.456		18.98	30.062
			19	57.5209		19	28.545
			19.02	57.5866		19.02	28.999
			19.04	57.6518		19.04	29.06
			19.06	57.7165		19.06	29.183
			19.08	57.7813		19.08	29.633
			19.1	57.8453		19.1	28.941
			19.12	57.9085		19.12	30.221
			19.14	57.9718		19.14	30.826
			19.16	58.0359		19.16	28.804
			19.18	58.1012		19.18	29.177
			19.2	58.1678		19.2	29.102
			19.22	58.2356		19.22	27.093
			19.24	58.3062		19.24	27.66
			19.26	58.3782		19.26	25.735
			19.28	58.4527		19.28	25.591
			19.3	58.5264		19.3	25.067
			19.32	58.5997		19.32	26.474
			19.34	58.6713		19.34	26.072
			19.36	58.743		19.36	26.881
			19.38	58.8146		19.38	26.303
			19.4	58.8859		19.4	26.255
			19.42	58.9568		19.42	27.187
			19.44	59.0274		19.44	26.817
			19.46	59.0981		19.46	26.448
			19.48	59.1689		19.48	27.24
			19.5	59.2432		19.5	26.572
			19.52	59.3219		19.52	22.798
			19.54	59.4028		19.54	22.857
			19.56	59.4804		19.56	24.651
			19.58	59.5576		19.58	25.758
			19.6	59.6347		19.6	23.2
			19.62	59.711		19.62	24.81
			19.64	59.7843		19.64	26.512
			19.66	59.8561		19.66	26.282
			19.68	59.928		19.68	26.417
			19.7	60		19.7	26.44
			19.72	60.0414		19.72	26.084
			19.74	60.0803		19.74	28.838
			19.76	60.1184		19.76	28.415
			19.78	60.1577		19.78	27.954
			19.8	60.1985		19.8	26.151
			19.82	60.2388		19.82	25.441
			19.84	60.279		19.84	28.791
			19.86	60.3186		19.86	26.5
			19.88	60.3594		19.88	26.566
			19.9	60.401		19.9	26.26
			19.92	60.4413		19.92	25.301
			19.94	60.4803		19.94	28.845
			19.96	60.5186		19.96	29.056
			19.98	60.558		19.98	26.663
			20	60.598		20	26.525
			20.02	60.6368		20.02	27.8752
			20.04	60.6738		20.04	29.2254
			20.06	60.7091		20.06	30.5756
			20.08	60.743		20.08	31.9258
			20.1	60.7754		20.1	33.276
			20.12	60.8077		20.12	34.726
			20.14	60.8396		20.14	32.606
			20.16	60.8716		20.16	34.334
			20.18	60.904		20.18	34.184
			20.2	60.9379		20.2	31.634
			20.22	60.9746		20.22	29.912
			20.24	61.014		20.24	26.787
			20.26	61.0558		20.26	25.524
			20.28	61.0964		20.28	25.321
			20.3	61.1361		20.3	28.892
			20.32	61.1731		20.32	27.521
			20.34	61.2094		20.34	31.367
			20.36	61.2445		20.36	30.331
			20.38	61.279		20.38	30.712
			20.4	61.3136		20.4	32.793
			20.42	61.3488		20.42	30.337
			20.44	61.3858		20.44	28.872
			20.46	61.4229		20.46	28.605
			20.48	61.4586		20.48	29.887
			20.5	61.4932		20.5	32.216
			20.52	61.5284		20.52	31.813
			20.54	61.5655		20.54	27.984
			20.56	61.6047		20.56	27.586
			20.58	61.6435		20.58	27.137
			20.6	61.6821		20.6	28.761
			20.62	61.7196		20.62	28.167
			20.64	61.7573		20.64	29.577
			20.66	61.7939		20.66	28.234
			20.68	61.8296		20.68	30.779
			20.7	61.8646		20.7	31.861
			20.72	61.9002		20.72	29.951
			20.74	61.9369		20.74	29.403
			20.76	61.9734		20.76	28.983
			20.78	62.0092		20.78	30.282
			20.8	62.0448		20.8	31.343
			20.82	62.0806		20.82	29.598
			20.84	62.1166		20.84	29.679
			20.86	62.1523		20.86	30.668
			20.88	62.1881		20.88	30.411
			20.9	62.2241		20.9	29.532
			20.92	62.2604		20.92	30.094
			20.94	62.2971		20.94	29.802
			20.96	62.334		20.96	28.541
			20.98	62.3705		20.98	29.458
			21	62.4058		21	30.878
			21.02	62.4407		21.02	31.447
			21.04	62.4759		21.04	30.561
			21.06	62.5116		21.06	30.067
			21.08	62.5476		21.08	30.352
			21.1	62.5843		21.1	29.439
			21.12	62.6219		21.12	28.648
			21.14	62.6593		21.14	28.283
			21.16	62.6972		21.16	29.581
			21.18	62.7349		21.18	27.874
			21.2	62.7711		21.2	28.41
			21.22	62.8044		21.22	33.353
			21.24	62.8364		21.24	35.545
			21.26	62.8685		21.26	32.353
			21.28	62.9008		21.28	33.084
			21.3	62.9326		21.3	35.019
			21.32	62.9645		21.32	34.082
			21.34	62.997		21.34	32.295
			21.36	63.0296		21.36	33.597
			21.38	63.0628		21.38	33.436
			21.4	63.0963		21.4	30.801
			21.42	63.1311		21.42	32.467
			21.44	63.1661		21.44	29.993
			21.46	63.2017		21.46	30.091
			21.48	63.2368		21.48	31.059
			21.5	63.2718		21.5	31.073
			21.52	63.3062		21.52	30.649
			21.54	63.3414		21.54	32.36
			21.56	63.3769		21.56	29.286
			21.58	63.4131		21.58	29.733
			21.6	63.448		21.6	30.544
			21.62	63.4819		21.62	32.655
			21.64	63.5151		21.64	32.425
			21.66	63.5487		21.66	32.398
			21.68	63.5834		21.68	31.738
			21.7	63.618		21.7	29.331
			21.72	63.6521		21.72	32.658
			21.74	63.6856		21.74	32.961
			21.76	63.7195		21.76	31.158
			21.78	63.7545		21.78	31.629
			21.8	63.7896		21.8	29.767
			21.82	63.8245		21.82	31.076
			21.84	63.8587		21.84	32.152
			21.86	63.8928		21.86	31.465
			21.88	63.9266		21.88	31.398
			21.9	63.959		21.9	33.261
			21.92	63.9899		21.92	35.485
			21.94	64.021		21.94	35.926
			21.96	64.0527		21.96	32.832
			21.98	64.0844		21.98	33.817
			22	64.1155		22	35.599
			22.02	64.1461		22.02	34.586
			22.04	64.1777		22.04	35.864
			22.06	64.2095		22.06	32.274
			22.08	64.2426		22.08	33.93
			22.1	64.2768		22.1	31.489
			22.12	64.3112		22.12	29.569
			22.14	64.3453		22.14	33.09
			22.16	64.3776		22.16	32.627
			22.18	64.4104		22.18	34.376
			22.2	64.4436		22.2	31.97
			22.22	64.4782		22.22	31.215
			22.24	64.5127		22.24	30.707
			22.26	64.5474		22.26	31.921
			22.28	64.5811		22.28	30.946
			22.3	64.6136		22.3	33.274
			22.32	64.6452		22.32	35.691
			22.34	64.677		22.34	33.541
			22.36	64.7103		22.36	32.664
			22.38	64.7451		22.38	31.268
			22.4	64.7815		22.4	29.262
			22.42	64.8184		22.42	28.469
			22.44	64.8544		22.44	30.091
			22.46	64.8891		22.46	31.47
			22.48	64.9216		22.48	31.918
			22.5	64.9526		22.5	36.43
			22.52	64.9826		22.52	36.287
			22.54	65.0127		22.54	35.265
			22.56	65.0443		22.56	36.168
			22.58	65.0772		22.58	31.238
			22.6	65.1117		22.6	31.239
			22.62	65.1452		22.62	31.372
			22.64	65.178		22.64	34.38
			22.66	65.2106		22.66	32.971
			22.68	65.2421		22.68	32.294
			22.7	65.2732		22.7	37.543
			22.72	65.3036		22.72	34.281
			22.74	65.3346		22.74	35.012
			22.76	65.366		22.76	35.116
			22.78	65.3983		22.78	33.423
			22.8	65.4306		22.8	31.827
			22.82	65.463		22.82	34.998
			22.84	65.4945		22.84	33.433
			22.86	65.5256		22.86	34.355
			22.88	65.5568		22.88	36.52
			22.9	65.5897		22.9	32.944
			22.92	65.6257		22.92	29.068
			22.94	65.6629		22.94	28.027
			22.96	65.6993		22.96	30.097
			22.98	65.7346		22.98	31.01
			23	65.7697		23	30.818
			23.02	65.8046		23.02	30.588
			23.04	65.8406		23.04	31.53
			23.06	65.8781		23.06	27.897
			23.08	65.9158		23.08	27.069
			23.1	65.9528		23.1	30.921
			23.12	65.988		23.12	29.616
			23.14	66.0234		23.14	31.745
			23.16	66.0583		23.16	30.255
			23.18	66.093		23.18	30.93
			23.2	66.1278		23.2	32.029
			23.22	66.1616		23.22	30.345
			23.24	66.1943		23.24	33.588
			23.26	66.2256		23.26	35.157
			23.28	66.2563		23.28	34.883
			23.3	66.2876		23.3	35.658
			23.32	66.3203		23.32	33.042
			23.34	66.3534		23.34	30.306
			23.36	66.3864		23.36	34.757
			23.38	66.4186		23.38	33.223
			23.4	66.4516		23.4	32.743
			23.42	66.4849		23.42	32.097
			23.44	66.519		23.44	32.677
			23.46	66.5535		23.46	30.329
			23.48	66.5872		23.48	31
			23.5	66.6196		23.5	34.808
			23.52	66.6508		23.52	34.235
			23.54	66.6828		23.54	34.884
			23.56	66.7154		23.56	32.207
			23.58	66.75		23.58	32.342
			23.6	66.786		23.6	29.276
			23.62	66.8209		23.62	28.461
			23.64	66.8545		23.64	34.976
			23.66	66.8874		23.66	33.312
			23.68	66.9204		23.68	30.234
			23.7	66.9531		23.7	34.641
			23.72	66.9849		23.72	34.394
			23.74	67.0168		23.74	32.874
			23.76	67.0491		23.76	34.165
			23.78	67.081		23.78	33.51
			23.8	67.113		23.8	34.007
			23.82	67.1446		23.82	33.648
			23.84	67.1769		23.84	34.986
			23.86	67.2097		23.86	31.718
			23.88	67.243		23.88	32.372
			23.9	67.2757		23.9	33.13
			23.92	67.308		23.92	33.74
			23.94	67.3402		23.94	33.531
			23.96	67.3723		23.96	33.539
			23.98	67.4039		23.98	33.736
			24	67.435		24	35.29
			24.02	67.4665		24.02	35.49
			24.04	67.4983		24.04	32.007
			24.06	67.5304		24.06	34.582
			24.08	67.5623		24.08	34.253
			24.1	67.5944		24.1	32.805
			24.12	67.6254		24.12	34.01
			24.14	67.6555		24.14	37.98
			24.16	67.6851		24.16	35.404
			24.18	67.7156		24.18	36.249
			24.2	67.7463		24.2	34.595
			24.22	67.7775		24.22	34.904
			24.24	67.8078		24.24	34.272
			24.26	67.8376		24.26	37.975
			24.28	67.8672		24.28	36.597
			24.3	67.8972		24.3	35.098
			24.32	67.9275		24.32	36.284
			24.34	67.9578		24.34	35.568
			24.36	67.9881		24.36	35.363
			24.38	68.0182		24.38	35.958
			24.4	68.0469		24.4	36.346
			24.42	68.0747		24.42	40.587
			24.44	68.1027		24.44	39.942
			24.46	68.1316		24.46	35.187
			24.48	68.1617		24.48	36.872
			24.5	68.1921		24.5	35.861
			24.52	68.224		24.52	33.767
			24.54	68.2565		24.54	32.167
			24.56	68.2887		24.56	33.939
			24.58	68.3209		24.58	34.567
			24.6	68.3532		24.6	31.966
			24.62	68.3864		24.62	34.034
			24.64	68.4196		24.64	31.477
			24.66	68.4534		24.66	32.197
			24.68	68.4863		24.68	32.218
			24.7	68.5192		24.7	34.395
			24.72	68.5524		24.72	31.851
			24.74	68.5862		24.74	31.403
			24.76	68.6201		24.76	32.637
			24.78	68.6538		24.78	31.521
			24.8	68.6873		24.8	32.239
			24.82	68.72		24.82	33.026
			24.84	68.7515		24.84	33.988
			24.86	68.7816		24.86	35.675
			24.88	68.81		24.88	38.302
			24.9	68.8381		24.9	39.949
			24.92	68.866		24.92	37.089
			24.94	68.894		24.94	39.487
			24.96	68.9223		24.96	39.02
			24.98	68.9516		24.98	36.191
			25	68.982		25	35.529
			25.02	69.0128		25.02	34.717
			25.04	69.0442		25.04	35.038
			25.06	69.0762		25.06	33.454
			25.08	69.1082		25.08	33.03
			25.1	69.1396		25.1	34.887
			25.12	69.1707		25.12	35.382
			25.14	69.2016		25.14	34.011
			25.16	69.2323		25.16	35.301
			25.18	69.2627		25.18	36.356
			25.2	69.2926		25.2	35.104
			25.22	69.3234		25.22	36.946
			25.24	69.3533		25.24	33.288
			25.26	69.3828		25.26	38.196
			25.28	69.4109		25.28	38.554
			25.3	69.4397		25.3	38.382
			25.32	69.4695		25.32	35.779
			25.34	69.4994		25.34	34.745
			25.36	69.5291		25.36	37.873
			25.38	69.5583		25.38	36.509
			25.4	69.5879		25.4	36.488
			25.42	69.6178		25.42	36.493
			25.44	69.648		25.44	35.609
			25.46	69.6787		25.46	35.17
			25.48	69.7096		25.48	34.943
			25.5	69.7404		25.5	34.723
			25.52	69.7713		25.52	35.867
			25.54	69.8024		25.54	34.132
			25.56	69.8323		25.56	34.399
			25.58	69.8615		25.58	39.799
			25.6	69.8903		25.6	36.994
			25.62	69.9205		25.62	35.765
			25.64	69.9513		25.64	34.67
			25.66	69.9821		25.66	34.864
			25.68	70.0129		25.68	35.604
			25.7	70.0447		25.7	34.635
			25.72	70.0775		25.72	31.878
			25.74	70.1108		25.74	32.243
			25.76	70.1436		25.76	33.228
			25.78	70.1757		25.78	33.642
			25.8	70.2078		25.8	34.056
			25.82	70.2392		25.82	33.167
			25.84	70.2704		25.84	36.209
			25.86	70.3024		25.86	34.392
			25.88	70.3358		25.88	30.719
			25.9	70.37		25.9	32.019
			25.92	70.4038		25.92	32.092
			25.94	70.4377		25.94	31.962
			25.96	70.4711		25.96	31.471
			25.98	70.5038		25.98	33.638
			26	70.5364		26	34.009
			26.02	70.5704		26.02	31.838
			26.04	70.6054		26.04	29.576
			26.06	70.6401		26.06	31.221
			26.08	70.6742		26.08	32.661
			26.1	70.7086		26.1	31.175
			26.12	70.7441		26.12	30.447
			26.14	70.78		26.14	29.818
			26.16	70.816		26.16	29.86
			26.18	70.8524		26.18	30.404
			26.2	70.8894		26.2	28.944
			26.22	70.9269		26.22	28.24
			26.24	70.9641		26.24	29.192
			26.26	71.0016		26.26	29.802
			26.28	71.0389		26.28	27.509
			26.3	71.0761		26.3	29.704
			26.32	71.1118		26.32	29.894
			26.34	71.1469		26.34	31.276
			26.36	71.1819		26.36	31
			26.38	71.2149		26.38	30.609
			26.4	71.2462		26.4	36.643
			26.42	71.2767		26.42	36.075
			26.44	71.3075		26.44	33.712
			26.46	71.3387		26.46	35.52
			26.48	71.3689		26.48	34.753
			26.5	71.3994		26.5	36.854
			26.52	71.4296		26.52	34.817
			26.54	71.4593		26.54	35.907
			26.56	71.4877		26.56	38.227
			26.58	71.516		26.58	40.255
			26.6	71.545		26.6	36.114
			26.62	71.575		26.62	35.267
			26.64	71.6046		26.64	36.541
			26.66	71.6342		26.66	37.793
			26.68	71.6644		26.68	35.445
			26.7	71.6963		26.7	33.971
			26.72	71.7288		26.72	32.162
			26.74	71.7604		26.74	33.637
			26.76	71.7915		26.76	36.989
			26.78	71.8227		26.78	33.71
			26.8	71.8549		26.8	33.237
			26.82	71.8875		26.82	33.741
			26.84	71.9202		26.84	32.452
			26.86	71.9526		26.86	32.945
			26.88	71.9837		26.88	34.675
			26.9	72.0147		26.9	36.596
			26.92	72.0454		26.92	33.465
			26.94	72.0765		26.94	35.473
			26.96	72.1083		26.96	35.195
			26.98	72.1407		26.98	31.484
			27	72.1738		27	33.433
			27.02	72.2053		27.02	32.871
			27.04	72.2355		27.04	36.599
			27.06	72.2646		27.06	38.089
			27.08	72.2936		27.08	36.614
			27.1	72.3233		27.1	37.269
			27.12	72.354		27.12	35.072
			27.14	72.3857		27.14	33.377
			27.16	72.4178		27.16	33.879
			27.18	72.4499		27.18	33.76
			27.2	72.482		27.2	33.347
			27.22	72.5142		27.22	34.008
			27.24	72.5454		27.24	33.308
			27.26	72.5756		27.26	36.65
			27.28	72.6047		27.28	37.372
			27.3	72.6342		27.3	37.305
			27.32	72.6639		27.32	35.186
			27.34	72.6931		27.34	36.62
			27.36	72.7209		27.36	39.298
			27.38	72.7486		27.38	40.944
			27.4	72.7775		27.4	36.757
			27.42	72.8091		27.42	34.198
			27.44	72.8426		27.44	31.836
			27.46	72.8766		27.46	30.74
			27.48	72.9098		27.48	32.729
			27.5	72.941		27.5	34.106
			27.52	72.9706		27.52	37.229
			27.54	72.9999		27.54	38.142
			27.56	73.0299		27.56	35.421
			27.58	73.061		27.58	34.538
			27.6	73.0922		27.6	34.359
			27.62	73.1235		27.62	34.964
			27.64	73.1539		27.64	34.271
			27.66	73.1839		27.66	37.575
			27.68	73.2131		27.68	36.09
			27.7	73.2427		27.7	37.329
			27.72	73.2726		27.72	36.244
			27.74	73.3025		27.74	34.808
			27.76	73.3325		27.76	37.298
			27.78	73.3624		27.78	35.956
			27.8	73.3928		27.8	35.418
			27.82	73.4232		27.82	35.258
			27.84	73.4534		27.84	35.8
			27.86	73.4838		27.86	36.265
			27.88	73.5151		27.88	34.839
			27.9	73.5473		27.9	32.286
			27.92	73.5803		27.92	33.615
			27.94	73.6121		27.94	32.541
			27.96	73.6425		27.96	35.54
			27.98	73.6712		27.98	38.556
			28	73.6992		28	38.915
			28.02	73.7271		28.02	38.359
			28.04	73.7559		28.04	38.899
			28.06	73.7859		28.06	35.402
			28.08	73.8169		28.08	33.952
			28.1	73.8489		28.1	35.162
			28.12	73.8813		28.12	32.374
			28.14	73.9139		28.14	32.404
			28.16	73.9462		28.16	34.547
			28.18	73.9773		28.18	33.722
			28.2	74.0087		28.2	35.665
			28.22	74.0393		28.22	33.912
			28.24	74.0702		28.24	36.463
			28.26	74.1017		28.26	34.6
			28.28	74.1361		28.28	31.967
			28.3	74.1737		28.3	27.646
			28.32	74.2138		28.32	26.69
			28.34	74.2549		28.34	26.402
			28.36	74.296		28.36	25.87
			28.38	74.3378		28.38	26.539
			28.4	74.3802		28.4	25.223
			28.42	74.4229		28.42	24.666
			28.44	74.4646		28.44	26.149
			28.46	74.5059		28.46	26.856
			28.48	74.5478		28.48	25.455
			28.5	74.5906		28.5	25.15
			28.52	74.6337		28.52	25.114
			28.54	74.6764		28.54	25.052
			28.56	74.719		28.56	25.667
			28.58	74.7609		28.58	25.513
			28.6	74.8015		28.6	26.189
			28.62	74.8401		28.62	28.222
			28.64	74.8771		28.64	29.549
			28.66	74.9126		28.66	29.885
			28.68	74.9475		28.68	31.906
			28.7	74.9822		28.7	31.158
			28.72	75.0174		28.72	30.171
			28.74	75.0524		28.74	30.868
			28.76	75.0869		28.76	31.564
			28.78	75.1214		28.78	31.522
			28.8	75.1568		28.8	30.955
			28.82	75.1924		28.82	29.033
			28.84	75.228		28.84	31.085
			28.86	75.2626		28.86	31.099
			28.88	75.2974		28.88	31.383
			28.9	75.3319		28.9	30.93
			28.92	75.3665		28.92	31.597
			28.94	75.4015		28.94	31.178
			28.96	75.437		28.96	29.941
			28.98	75.4729		28.98	30.009
			29	75.5079		29	30.501
			29.02	75.5418		29.02	32.25
			29.04	75.5758		29.04	32.747
			29.06	75.6102		29.06	30.375
			29.08	75.6456		29.08	31.249
			29.1	75.6805		29.1	29.947
			29.12	75.7155		29.12	31.541
			29.14	75.7504		29.14	31.159
			29.16	75.7853		29.16	30.255
			29.18	75.8203		29.18	31.581
			29.2	75.8551		29.2	30.893
			29.22	75.8903		29.22	30.586
			29.24	75.9261		29.24	30.573
			29.26	75.9619		29.26	29.455
			29.28	75.9983		29.28	30.485
			29.3	76.0345		29.3	29.299
			29.32	76.0707		29.32	29.652
			29.34	76.1066		29.34	30.769
			29.36	76.1428		29.36	29.775
			29.38	76.18		29.38	29.087
			29.4	76.2185		29.4	28.18
			29.42	76.2578		29.42	27.119
			29.44	76.2971		29.44	27.082
			29.46	76.3358		29.46	28.29
			29.48	76.3742		29.48	28.585
			29.5	76.4128		29.5	27.548
			29.52	76.4526		29.52	27.694
			29.54	76.4931		29.54	26.256
			29.56	76.5346		29.56	26.198
			29.58	76.5757		29.58	25.615
			29.6	76.6158		29.6	27.139
			29.62	76.6551		29.62	28.004
			29.64	76.6945		29.64	27.49
			29.66	76.7342		29.66	26.683
			29.68	76.7738		29.68	27.582
			29.7	76.8125		29.7	27.557
			29.72	76.8505		29.72	28.789
			29.74	76.8875		29.74	28.827
			29.76	76.9245		29.76	30.049
			29.78	76.9619		29.78	28.864
			29.8	77		29.8	27.73
			29.82	77.0683		29.82	28.52
			29.84	77.1386		29.84	26.263
			29.86	77.2106		29.86	25.327
			29.88	77.282		29.88	26.655
			29.9	77.3531		29.9	26.924
			29.92	77.4257		29.92	25.657
			29.94	77.4985		29.94	25.099
			29.96	77.5717		29.96	26.577
			29.98	77.6443		29.98	25.316
			30	77.7189		30	25.776
			30.02	77.7964		30.02	24.404
			30.04	77.878		30.04	22.486
			30.06	77.9628		30.06	22.189
			30.08	78.0486		30.08	21.741
			30.1	78.1352		30.1	21.803
			30.12	78.2218		30.12	21.507
			30.14	78.3083		30.14	21.747
			30.16	78.395		30.16	21.875
			30.18	78.4829		30.18	21.361
			30.2	78.5712		30.2	20.826
			30.22	78.659		30.22	21.666
			30.24	78.746		30.24	21.646
			30.26	78.8346		30.26	21.451
			30.28	78.9244		30.28	20.535
			30.3	79.0151		30.3	20.775
			30.32	79.1061		30.32	20.789
			30.34	79.196		30.34	20.333
			30.36	79.2851		30.36	21.57
			30.38	79.3734		30.38	21.307
			30.4	79.4619		30.4	20.972
			30.42	79.5521		30.42	21.361
			30.44	79.6429		30.44	20.18
			30.46	79.7347		30.46	20.513
			30.48	79.8253		30.48	20.66
			30.5	79.916		30.5	20.98
			30.52	80.0064		30.52	20.532
			30.54	80.0968		30.54	20.818
			30.56	80.1871		30.56	20.922
			30.58	80.2765		30.58	20.658
			30.6	80.3648		30.6	21.503
			30.62	80.4527		30.62	21.64
			30.64	80.5422		30.64	20.954
			30.66	80.6327		30.66	20.321
			30.68	80.7238		30.68	20.986
			30.7	80.8154		30.7	20.586
			30.72	80.9099		30.72	19.929
			30.74	81.006		30.74	19.121
			30.76	81.104		30.76	19.561
			30.78	81.2025		30.78	18.824
			30.8	81.3008		30.8	18.821
			30.82	81.3977		30.82	19.67
			30.84	81.4925		30.84	19.662
			30.86	81.5878		30.86	20.059
			30.88	81.6813		30.88	19.43
			30.9	81.7739		30.9	20.785
			30.92	81.8645		30.92	20.645
			30.94	81.9553		30.94	20.728
			30.96	82.0462		30.96	20.694
			30.98	82.1363		30.98	20.537
			31	82.226		31	21.285
			31.02	82.3149		31.02	21.007
			31.04	82.4051		31.04	21.138
			31.06	82.4954		31.06	20.311
			31.08	82.5841		31.08	20.9
			31.1	82.6711		31.1	22.332
			31.12	82.7575		31.12	21.563
			31.14	82.845		31.14	21.305
			31.16	82.9315		31.16	21.51
			31.18	83.0173		31.18	22.331
			31.2	83.103		31.2	21.816
			31.22	83.1883		31.22	21.645
			31.24	83.273		31.24	22.534
			31.26	83.355		31.26	22.397
			31.28	83.4362		31.28	23.733
			31.3	83.5175		31.3	23.318
			31.32	83.5996		31.32	22.232
			31.34	83.6819		31.34	23.103
			31.36	83.7623		31.36	23.117
			31.38	83.8411		31.38	23.837
			31.4	83.9187		31.4	24.525
			31.42	83.9951		31.42	24.275
			31.44	84.0719		31.44	24.915
			31.46	84.148		31.46	24.189
			31.48	84.224		31.48	24.923
			31.5	84.3004		31.5	25.011
			31.52	84.3766		31.52	23.86
			31.54	84.4524		31.54	25.08
			31.56	84.5264		31.56	25.353
			31.58	84.5989		31.58	25.709
			31.6	84.671		31.6	26.667
			31.62	84.7415		31.62	25.758
			31.64	84.8129		31.64	27.547
			31.66	84.8837		31.66	25.599
			31.68	84.9567		31.68	26.412
			31.7	85.0289		31.7	25.138
			31.72	85.1006		31.72	26.514
			31.74	85.1707		31.74	26.99
			31.76	85.2427		31.76	26.804
			31.78	85.3172		31.78	24.529
			31.8	85.394		31.8	24.229
			31.82	85.4693		31.82	24.647
			31.84	85.5422		31.84	25.901
			31.86	85.614		31.86	26.79
			31.88	85.6863		31.88	25.76
			31.9	85.7604		31.9	25.351
			31.92	85.8356		31.92	24.954
			31.94	85.9108		31.94	24.629
			31.96	85.9868		31.96	25.361
			31.98	86.0629		31.98	24.153
			32	86.1401		32	24.516
			32.02	86.2165		32.02	24.318
			32.04	86.2919		32.04	24.888
			32.06	86.3679		32.06	25.507
			32.08	86.4443		32.08	23.762
			32.1	86.5218		32.1	24.458
			32.12	86.5976		32.12	24.516
			32.14	86.6731		32.14	25.381
			32.16	86.749		32.16	24.684
			32.18	86.8258		32.18	24.203
			32.2	86.9031		32.2	24.454
			32.22	86.9793		32.22	24.267
			32.24	87.0553		32.24	25.247
			32.26	87.1329		32.26	24.622
			32.28	87.2117		32.28	22.717
			32.3	87.2906		32.3	24.117
			32.32	87.365		32.32	24.646
			32.34	87.4364		32.34	26.899
			32.36	87.5057		32.36	27.359
			32.38	87.5759		32.38	27.046
			32.4	87.6478		32.4	25.929
			32.42	87.7214		32.42	25.404
			32.44	87.7942		32.44	25.202
			32.46	87.8665		32.46	26.783
			32.48	87.9381		32.48	25.918
			32.5	88.0111		32.5	26
			32.52	88.0845		32.52	25.226
			32.54	88.1574		32.54	25.567
			32.56	88.2292		32.56	26.567
			32.58	88.3007		32.58	26.27
			32.6	88.3714		32.6	25.962
			32.62	88.4424		32.62	27.505
			32.64	88.5147		32.64	25.835
			32.66	88.5885		32.66	24.654
			32.68	88.6599		32.68	25.88
			32.7	88.7286		32.7	28.299
			32.72	88.7958		32.72	27.877
			32.74	88.8639		32.74	27.622
			32.76	88.9335		32.76	27.234
			32.78	89.0039		32.78	26.105
			32.8	89.0745		32.8	26.721
			32.82	89.1439		32.82	27.043
			32.84	89.2133		32.84	27.365
			32.86	89.2836		32.86	26.791
			32.88	89.3541		32.88	26.014
			32.9	89.4241		32.9	27.041
			32.92	89.4939		32.92	27.505
			32.94	89.564		32.94	26.189
			32.96	89.6355		32.96	26.697
			32.98	89.707		32.98	25.863
			33	89.7799		33	26.296
			33.02	89.8531		33.02	25.095
			33.04	89.9277		33.04	25.612
			33.06	90.0025		33.06	24.817
			33.08	90.0762		33.08	24.893
			33.1	90.148		33.1	26.754
			33.12	90.2193		33.12	26.739
			33.14	90.2922		33.14	25.596
			33.16	90.3686		33.16	24.981
			33.18	90.4471		33.18	23.171
			33.2	90.5264		33.2	23.631
			33.22	90.605		33.22	24.183
			33.24	90.6841		33.24	23.893
			33.26	90.7645		33.26	23.183
			33.28	90.8441		33.28	22.998
			33.3	90.9213		33.3	24.55
			33.32	90.997		33.32	25.456
			33.34	91.0728		33.34	24.463
			33.36	91.1501		33.36	24.439
			33.38	91.2286		33.38	23.942
			33.4	91.3072		33.4	23.383
			33.42	91.388		33.42	24.409
			33.44	91.4699		33.44	21.917
			33.46	91.5544		33.46	22.477
			33.48	91.6399		33.48	22.252
			33.5	91.725		33.5	21.228
			33.52	91.8093		33.52	22.727
			33.54	91.8914		33.54	22.827
			33.56	91.9719		33.56	23.099
			33.58	92.0505		33.58	24.109
			33.6	92.1275		33.6	24.481
			33.62	92.2042		33.62	24.509
			33.64	92.2807		33.64	24.457
			33.66	92.3584		33.66	24.743
			33.68	92.4366		33.68	23.351
			33.7	92.5167		33.7	23.949
			33.72	92.5972		33.72	23.041
			33.74	92.6786		33.74	22.937
			33.76	92.7605		33.76	23.275
			33.78	92.8403		33.78	22.572
			33.8	92.9194		33.8	24.808
			33.82	92.9957		33.82	23.817
			33.84	93.0731		33.84	25.187
			33.86	93.1483		33.86	23.869
			33.88	93.2235		33.88	25.78
			33.9	93.2965		33.9	25.271
			33.92	93.3704		33.92	26.235
			33.94	93.4444		33.94	24.672
			33.96	93.5177		33.96	25.209
			33.98	93.5896		33.98	27.03
			34	93.6609		34	26.089
			34.02	93.7329		34.02	25.893
			34.04	93.8042		34.04	26.343
			34.06	93.8756		34.06	26.723
			34.08	93.9475		34.08	25.9
			34.1	94.0198		34.1	25.712
			34.12	94.0916		34.12	26.386
			34.14	94.1632		34.14	26.287
			34.16	94.2351		34.16	26.021
			34.18	94.306		34.18	26.048
			34.2	94.3746		34.2	27.444
			34.22	94.4405		34.22	28.596
			34.24	94.5052		34.24	29.531
			34.26	94.5712		34.26	28.961
			34.28	94.6388		34.28	26.914
			34.3	94.7088		34.3	27.455
			34.32	94.7791		34.32	26.07
			34.34	94.8501		34.34	26.68
			34.36	94.9191		34.36	26.544
			34.38	94.9876		34.38	28.491
			34.4	95.0552		34.4	27.243
			34.42	95.1231		34.42	27.615
			34.44	95.1903		34.44	28.142
			34.46	95.2588		34.46	27.989
			34.48	95.3291		34.48	26.141
			34.5	95.4013		34.5	26.013
			34.52	95.4739		34.52	25.9
			34.54	95.5458		34.54	25.711
			34.56	95.6173		34.56	26.72
			34.58	95.6871		34.58	26.41
			34.6	95.7565		34.6	27.564
			34.62	95.8255		34.62	27.252
			34.64	95.8957		34.64	26.824
			34.66	95.966		34.66	26.163
			34.68	96.0362		34.68	27.206
			34.7	96.1056		34.7	26.901
			34.72	96.1759		34.72	26.998
			34.74	96.2467		34.74	26.256
			34.76	96.3181		34.76	26.341
			34.78	96.3906		34.78	26.304
			34.8	96.4637		34.8	25.083
			34.82	96.5371		34.82	25.759
			34.84	96.6096		34.84	25.926
			34.86	96.6826		34.86	25.98
			34.88	96.7573		34.88	25.297
			34.9	96.8347		34.9	24.113
			34.92	96.9141		34.92	23.458
			34.94	96.9939		34.94	23.391
			34.96	97.0729		34.96	23.751
			34.98	97.1502		34.98	24.189
			35	97.2259		35	24.876
			35.02	97.3008		35.02	25.386
			35.04	97.3767		35.04	24.975
			35.06	97.4545		35.06	23.835
			35.08	97.5331		35.08	23.653
			35.1	97.6124		35.1	24.158
			35.12	97.6908		35.12	23.302
			35.14	97.7677		35.14	24.422
			35.16	97.8441		35.16	25.546
			35.18	97.9212		35.18	23.768
			35.2	98		35.2	23.755
			35.22	98.1074		35.22	23.963
			35.24	98.2138		35.24	23.375
			35.26	98.3216		35.26	24.43
			35.28	98.4316		35.28	22.99
			35.3	98.5456		35.3	22.007
			35.32	98.6614		35.32	21.961
			35.34	98.7772		35.34	21.977
			35.36	98.8924		35.36	21.985
			35.38	99.0081		35.38	22.329
			35.4	99.1255		35.4	21.712
			35.42	99.2422		35.42	20.967
			35.44	99.3589		35.44	22.78
			35.46	99.4749		35.46	21.641
			35.48	99.5945		35.48	21.415
			35.5	99.7157		35.5	20.8
			35.52	99.8358		35.52	20.775
			35.54	99.9558		35.54	21.976
			35.56	100.075		35.56	20.909
			35.58	100.196		35.58	21.014
			35.6	100.316		35.6	21.464
			35.62	100.436		35.62	21.07
			35.64	100.556		35.64	21.146
			35.66	100.676		35.66	21.146
			35.68	100.797		35.68	21.255
			35.7	100.92		35.7	20.692
			35.72	101.045		35.72	20.274
			35.74	101.172		35.74	20.208
			35.76	101.298		35.76	19.675
			35.78	101.424		35.78	20.576
			35.8	101.55		35.8	20.197
			35.82	101.677		35.82	19.982
			35.84	101.804		35.84	19.971
			35.86	101.931		35.86	20.156
			35.88	102.059		35.88	20.103
			35.9	102.186		35.9	19.568
			35.92	102.312		35.92	20.184
			35.94	102.437		35.94	20.732
			35.96	102.559		35.96	20.521
			35.98	102.681		35.98	21.028
			36	102.799		36	21.251
			36.02	102.914		36.02	22.387
			36.04	103.025		36.04	22.641
			36.06	103.135		36.06	23.774
			36.08	103.243		36.08	23.176
			36.1	103.353		36.1	23.461
			36.12	103.464		36.12	22.833
			36.14	103.575		36.14	22.73
			36.16	103.686		36.16	23.175
			36.18	103.798		36.18	22.476
			36.2	103.911		36.2	22.806
			36.22	104.023		36.22	22.426
			36.24	104.135		36.24	22.744
			36.26	104.245		36.26	22.909
			36.28	104.355		36.28	23.732
			36.3	104.465		36.3	22.773
			36.32	104.576		36.32	22.903
			36.34	104.686		36.34	23.268
			36.36	104.797		36.36	23.201
			36.38	104.91		36.38	22.661
			36.4	105.025		36.4	21.62
			36.42	105.142		36.42	21.811
			36.44	105.259		36.44	21.788
			36.46	105.376		36.46	21.716
			36.48	105.491		36.48	21.897
			36.5	105.605		36.5	22.737
			36.52	105.718		36.52	22.577
			36.54	105.834		36.54	21.75
			36.56	105.952		36.56	21.458
			36.58	106.07		36.58	21.627
			36.6	106.187		36.6	22.026
			36.62	106.308		36.62	21.165
			36.64	106.434		36.64	19.822
			36.66	106.561		36.66	20.056
			36.68	106.688		36.68	20.036
			36.7	106.816		36.7	20.072
			36.72	106.942		36.72	19.563
			36.74	107.065		36.74	21.075
			36.76	107.186		36.76	21.449
			36.78	107.308		36.78	20.474
			36.8	107.431		36.8	20.683
			36.82	107.55		36.82	20.918
			36.84	107.666		36.84	22.358
			36.86	107.781		36.86	22.38
			36.88	107.893		36.88	21.876
			36.9	108		36.9	24.247
			36.92	108.125		36.92	24.923
			36.94	108.247		36.94	24.561
			36.96	108.369		36.96	25.796
			36.98	108.488		36.98	25.694
			37	108.606		37	25.726
			37.02	108.722		37.02	26.422
			37.04	108.833		37.04	27.757
			37.06	108.941		37.06	28.859
			37.08	109.051		37.08	28.169
			37.1	109.162		37.1	27.26
			37.12	109.272		37.12	27.818
			37.14	109.38		37.14	28.43
			37.16	109.487		37.16	28.799
			37.18	109.593		37.18	29.517
			37.2	109.701		37.2	28.007
			37.22	109.809		37.22	28.369
			37.24	109.915		37.24	28.515
			37.26	110.017		37.26	30.557
			37.28	110.12		37.28	30.969
			37.3	110.227		37.3	27.624
			37.32	110.338		37.32	27.847
			37.34	110.449		37.34	27.508
			37.36	110.557		37.36	27.868
			37.38	110.661		37.38	30.144
			37.4	110.764		37.4	30.06
			37.42	110.871		37.42	29.427
			37.44	110.982		37.44	26.84
			37.46	111.096		37.46	26.987
			37.48	111.21		37.48	26.604
			37.5	111.323		37.5	27.589
			37.52	111.432		37.52	27.525
			37.54	111.545		37.54	28.717
			37.56	111.659		37.56	25.766
			37.58	111.776		37.58	26.132
			37.6	111.891		37.6	26.922
			37.62	112.003		37.62	27.376
			37.64	112.114		37.64	27.456
			37.66	112.226		37.66	28.223
			37.68	112.338		37.68	27.198
			37.7	112.45		37.7	26.642
			37.72	112.561		37.72	28.808
			37.74	112.671		37.74	27.345
			37.76	112.783		37.76	27.692
			37.78	112.895		37.78	27.149
			37.8	113.006		37.8	27.711
			37.82	113.117		37.82	28.139
			37.84	113.229		37.84	27.169
			37.86	113.343		37.86	26.52
			37.88	113.459		37.88	27.366
			37.9	113.575		37.9	25.543
			37.92	113.693		37.92	26.612
			37.94	113.813		37.94	25.646
			37.96	113.935		37.96	24.665
			37.98	114.056		37.98	25.707
			38	114.178		38	25.433
			38.02	114.305		38.02	24.172
			38.04	114.434		38.04	23.127
			38.06	114.564		38.06	24.117
			38.08	114.69		38.08	23.978
			38.1	114.817		38.1	24.668
			38.12	114.941		38.12	24.38
			38.14	115.067		38.14	24.744
			38.16	115.191		38.16	24.426
			38.18	115.314		38.18	24.951
			38.2	115.435		38.2	25.371
			38.22	115.556		38.22	25.926
			38.24	115.678		38.24	25.003
			38.26	115.802		38.26	24.707
			38.28	115.927		38.28	24.547
			38.3	116.056		38.3	24.348
			38.32	116.187		38.32	22.705
			38.34	116.323		38.34	23.215
			38.36	116.463		38.36	21.804
			38.38	116.6		38.38	21.106
			38.4	116.736		38.4	24.075
			38.42	116.87		38.42	22.544
			38.44	117.009		38.44	22.196
			38.46	117.147		38.46	21.818
			38.48	117.283		38.48	22.835
			38.5	117.414		38.5	23.081
			38.52	117.544		38.52	24.414
			38.54	117.67		38.54	23.314
			38.56	117.796		38.56	25.605
			38.58	117.92		38.58	24.242
			38.6	118.048		38.6	24.34
			38.62	118.178		38.62	23.502
			38.64	118.307		38.64	23.02
			38.66	118.433		38.66	24.949
			38.68	118.56		38.68	24.992
			38.7	118.691		38.7	22.618
			38.72	118.827		38.72	22.91
			38.74	118.964		38.74	22.201
			38.76	119.105		38.76	22.17
			38.78	119.25		38.78	20.902
			38.8	119.398		38.8	20.603
			38.82	119.546		38.82	20.628
			38.84	119.689		38.84	21.373
			38.86	119.827		38.86	22.467
			38.88	119.963		38.88	22.934
			38.9	120.096		38.9	22.304
			38.92	120.233		38.92	23.728
			38.94	120.37		38.94	21.535
			38.96	120.51		38.96	21.964
			38.98	120.649		38.98	22.349
			39	120.787		39	22.084
			39.02	120.927		39.02	22.006
			39.04	121.067		39.04	21.969
			39.06	121.212		39.06	21.625
			39.08	121.358		39.08	20.374
			39.1	121.508		39.1	20.917
			39.12	121.658		39.12	20.274
			39.14	121.814		39.14	19.994
			39.16	121.97		39.16	19.015
			39.18	122.126		39.18	20.103
			39.2	122.281		39.2	20.02
			39.22	122.437		39.22	19.246
			39.24	122.596		39.24	19.803
			39.26	122.756		39.26	18.749
			39.28	122.919		39.28	19.196
			39.3	123.083		39.3	18.594
			39.32	123.246		39.32	18.487
			39.34	123.405		39.34	19.487
			39.36	123.565		39.36	19.993
			39.38	123.729		39.38	18.038
			39.4	123.901		39.4	18.086
			39.42	124.074		39.42	17.649
			39.44	124.249		39.44	17.46
			39.46	124.426		39.46	17.46
			39.48	124.603		39.48	17.286
			39.5	124.782		39.5	17.287
			39.52	124.964		39.52	16.766
			39.54	125.145		39.54	16.831
			39.56	125.321		39.56	17.342
			39.58	125.488		39.58	18.012
			39.6	125.648		39.6	19.878
			39.62	125.803		39.62	19.671
			39.64	125.959		39.64	20.184
			39.66	126.114		39.66	19.123
			39.68	126.272		39.68	19.924
			39.7	126.431		39.7	19.475
			39.72	126.595		39.72	18.4
			39.74	126.76		39.74	18.594
			39.76	126.921		39.76	18.711
			39.78	127.078		39.78	19.877
			39.8	127.229		39.8	20.287
			39.82	127.377		39.82	20.802
			39.84	127.519		39.84	21.1
			39.86	127.655		39.86	23.251
			39.88	127.785		39.88	23.141
			39.9	127.909		39.9	24.481
[truncated: 7,005 more rows]

## Sheet: G50246
Kang, S., et al., 2022, Paleoclimates inform on a weakening and amplitude-reduced East Asian winter monsoon in the warming future: Geology, v. 50, https://doi.org/10.1130/G50246.1
